# Supplementary material for: A zero-field single-molecule magnet with luminescence thermometry capabilities containing soft donors
Source: Royal Society of Chemistry journal article supplement (doi:10.1039/d2tc01661c), 2022-01-01
Supplement: d2tc01661c1.pdf [file d2tc01661c1.pdf]

## **A Zero-Field Single-Molecule Magnet with Luminescence Thermometry Capabilities Containing Soft Donors**

Riccardo Marin,<sup>\*[a]†</sup> Diogo Alves Gálico,<sup>[b]†</sup> Rezeda Gayfullina,<sup>[c]</sup> Jani O. Moilanen,<sup>[c]</sup> Luís D. Carlos,<sup>[d]</sup>  
Daniel Jaque<sup>[a],[e]</sup> and Muralee Murugesu<sup>\*[b]</sup>

- <sup>a.</sup> Nanomaterials for Bioimaging Group (nanoBIG), Departamento de Física de Materiales, Facultad de Ciencias, Universidad Autónoma de Madrid, C/ Francisco Tomás y Valiente 7, Madrid 28049, Spain.
- <sup>b.</sup> Department of Chemistry and Biomolecular Sciences, University of Ottawa, Ottawa, Ontario K1N 6N5, Canada.
- <sup>c.</sup> Department of Chemistry, University of Jyväskylä, Jyväskylä, FI-40014, Finland.
- <sup>d.</sup> Phantom-g, CICECO – Aveiro Institute of Materials, Department of Physics, Universidade de Aveiro 3810-193 Aveiro, Portugal.
- <sup>e.</sup> Nanomaterials for Bioimaging Group (nanoBIG), Instituto Ramón y Cajal de Investigación Sanitaria, Hospital Ramón y Cajal, Ctra. De Colmenar Viejo, Km. 9100, 28034 Madrid, Spain

### **TABLE OF CONTENT**

|                                                                                                            |      |
|------------------------------------------------------------------------------------------------------------|------|
| 1. Materials and Methods                                                                                   | S-2  |
| 2. Structural and chemical characterization of [Dy(tba) <sub>3</sub> phen]·CH <sub>2</sub> Cl <sub>2</sub> | S-3  |
| 3. Additional magnetic data                                                                                | S-6  |
| 4. Mathematical treatment of luminescence thermometry data                                                 | S-11 |
| 5. Computational details, data, and additional discussion                                                  | S-13 |
| 6. Simulation of the thermometric performance                                                              | S-45 |
| References                                                                                                 | S-46 |

## 1. Materials and Methods

**Chemicals.** Dysprosium nitrate pentahydrate ( $\text{Dy}(\text{NO}_3)_3 \cdot 5\text{H}_2\text{O}$ , 99.9%, Alfa Aesar), thiobenzoic acid (Htba, >93%, TCI), potassium carbonate ( $\text{K}_2\text{CO}_3$ , Fisher Scientific), 1,10-phenanthroline (phen, Alfa Aesar), chloroform, deionized water.

**Synthesis of Ktba.** The potassium salt of the thioacid was synthesized according to a method adapted from the literature.<sup>1</sup> Briefly, 5 mL of Htba (64.2 mmol) was added to a stirring solution of 4.4 g (32.1 mmol) of  $\text{K}_2\text{CO}_3$  in 100 mL of deionized water. The yellow solution was stirred for 2 h, filtered, and the water was removed with the aid of a rotary evaporator. A beige solid was collected, redissolved in 50 mL of water, filtered, and dried again. K(tba) was collected as a slightly yellow powder and recrystallized from hot ethanol, yielding bright yellow crystals.

**Synthesis of  $[\text{Dy}(\text{tba})_3\text{phen}] \cdot \text{CH}_2\text{Cl}_2$ .** Three mmoles (528.9 mg) of Ktba and 1 mmol of phen (180.2 mg) were added to a 25-mL beaker along with 7.5 mL of water. The ligand solution was brought to 80 °C until all the solids were dissolved. The solution was then cooled to room temperature and 2 mL of a 0.5 M aqueous solution of  $\text{Dy}(\text{NO}_3)_3 \cdot 5\text{H}_2\text{O}$  was added dropwise. Upon addition of the metal ion solution, a precipitate immediately formed. The mixture was kept under stirring for 1 h. The solid was filtered, washed three times with deionized water, and allowed to dry at room temperature overnight. Recrystallization of the complex was performed dissolving the solid in dichloromethane, filtering the clear solution and slowly evaporating the solvent. Yield: 32 %. **FTIR:** 3082 (w), 3059 (w), 2925 (w), 2856 (w), 1625 (w), 1591 (m), 1517 (m), 1463 (s), 1425 (s), 1344 (w), 1304 (m), 1257 (w), 1221 (s), 1167 (m), 1143 (w), 1103 (w), 1075 (w), 1027 (w), 1000 (w), 968 (s), 937 (w), 847 (m), 778 (m), 727 (m), 692 (m), 656 (w), 617 (w), 560 (m), 486 (m). **Chemical composition exp. (calc.):** C 48.91% (48.72%), H 3.16% (2.89%), N 3.33 % (3.34%), S 11.07% (11.48%).

**Structural and physicochemical characterization.** Single-crystal X-ray diffraction (SC-XRD) measurements were performed on a Kappa Apex II (X8 APEX) Single-crystal Diffractometer using a Mo source ( $\lambda = 0.7107 \text{ \AA}$ ). Infrared spectra were obtained in transmission mode on a Spectrum Two instrument (Perkin Elmer) in the 450–4000  $\text{cm}^{-1}$  range with 4  $\text{cm}^{-1}$  resolution, preparing KBr tablets containing 1 wt% of the analysed material. Elemental analysis was carried out on a CHNS-932 (LECO) elemental analyser using 1 mg of sample, using the Dumas method, which is based on a direct oxidative combustion of the sample at 1000 °C.

**Magnetic characterization.** The magnetic susceptibility measurements were obtained using a Quantum Design SQUID magnetometer MPMS-XL7 operating between 1.8 and 300 K. DC and/or AC measurements were performed on 8.2 mg of a polycrystalline sample. The sample was restrained with silicon grease and wrapped in a polyethylene membrane. The sample was subjected to DC fields of -7 to 7 T, and a 3.78 Oe driving field was used for AC measurements. The magnetization data were collected at 100 K to check for ferromagnetic impurities that were absent in all samples. Diamagnetic corrections were applied for the sample holder and the inherent diamagnetism of the sample was estimated with the use of Pascals' constants.

**Spectroscopic characterization.** The photoluminescence data were obtained using a QuantaMaster 8075-21 Spectrofluorometer (Horiba). An ozone-free PowerArc energy 75-W xenon lamp was used as the radiation source. The excitation spectra were corrected in real time according to the lamp intensity and the optical system of the excitation monochromator using a silicon diode as a reference. The emission spectra were corrected according to the optical system of the emission monochromator and the photomultiplier response (Hamamatsu R13456 red extended PMT). Low-temperature measurements were performed with the sample mounted inside a closed cycle helium cryostat system CS202\*E-DMX-1AL (Advanced Research Systems) controlled via a LakeShore 335 temperature controller. The spectrum in Figure 3C was fit using 10 Gaussian curves (2 hot bands and 8  $\text{Dy}^{3+} \text{ } ^6\text{H}_{15/2}$  Kramers doublets), refining peak position, width, and area of each component. All parameters were left free to vary.

2. Structural and chemical characterization of [Dy(tba)<sub>3</sub>phen]·CH<sub>2</sub>Cl<sub>2</sub>**Table S1.** Crystallographic data and selected data collection parameters

|                                              | [Dy(tba) <sub>3</sub> phen]·CH <sub>2</sub> Cl <sub>2</sub>                                    |
|----------------------------------------------|------------------------------------------------------------------------------------------------|
| Chemical formula                             | C <sub>34</sub> H <sub>25</sub> Cl <sub>2</sub> DyN <sub>2</sub> O <sub>3</sub> S <sub>3</sub> |
| Molecular weight (a.u.)                      | 839.14                                                                                         |
| Crystal system                               | Monoclinic                                                                                     |
| Space group                                  | <i>P</i> 2 <sub>1</sub> / <i>c</i>                                                             |
| a, b, c (Å)                                  | 13.8693(4), 15.1532(4), 16.6644(5)                                                             |
| α, β, γ (°)                                  | 90, 106.6357(13), 90                                                                           |
| V (Å <sup>3</sup> )                          | 3355.67(17)                                                                                    |
| Z                                            | 4                                                                                              |
| Calculated density                           | 1.661                                                                                          |
| μ (mm <sup>-1</sup> )                        | 2.610                                                                                          |
| Acquisition temperature (K)                  | 250                                                                                            |
| Θ range for data acquisition (°)             | 1.53 – 25.35                                                                                   |
| Limiting indices                             | h = ±16, k = ±18, l = ±20                                                                      |
| Data, restraints, parameters                 | 6134, 70, 428                                                                                  |
| Goodness-of-fit                              | 1.040                                                                                          |
| R <sub>1</sub> , wR <sub>2</sub> (I > 2σ(I)) | 0.0205, 0.0424                                                                                 |
| R <sub>1</sub> , wR <sub>2</sub> (all data)  | 0.0301, 0.0466                                                                                 |

**Table S2.** Results of the SHAPE analysis for [Dy(tba)<sub>3</sub>phen]·CH<sub>2</sub>Cl<sub>2</sub> relative to an idealized 8-vertex polyhedron. The best match is highlighted in **bold**.

| SHAPE code   | Point group                  | Description                                  | Values       |
|--------------|------------------------------|----------------------------------------------|--------------|
| OP-8         | <i>D</i> <sub>8h</sub>       | Octagon                                      | 28.245       |
| HPY-8        | <i>C</i> <sub>7v</sub>       | Heptagonal pyramid                           | 23.739       |
| HBPY-8       | <i>D</i> <sub>6h</sub>       | Hexagonal bipyramid                          | 13.935       |
| CU-8         | <i>O</i> <sub>h</sub>        | Cube                                         | 12.771       |
| SAPR-8       | <i>D</i> <sub>4d</sub>       | Square antiprism                             | 4.709        |
| <b>TDD-8</b> | <b><i>D</i><sub>2d</sub></b> | <b>Triangular dodecahedron</b>               | <b>3.023</b> |
| JGBF-8       | <i>D</i> <sub>2d</sub>       | Johnson gyrobifastigium (J26)                | 11.497       |
| JETBPY-8     | <i>D</i> <sub>3h</sub>       | Johnson elongated triangular bipyramid (J14) | 24.390       |
| JBTP-8       | <i>C</i> <sub>2v</sub>       | Johnson biaugmented trigonal prism (J50)     | 4.180        |
| BTPR-8       | <i>C</i> <sub>2v</sub>       | Biaugmented trigonal prism                   | 4.032        |
| JSD-8        | <i>D</i> <sub>2d</sub>       | Snub disphenoid (J84)                        | 4.009        |
| TT-8         | <i>T</i> <sub>d</sub>        | Triakis tetrahedron                          | 12.704       |
| ETBPY-8      | <i>D</i> <sub>3h</sub>       | Elongated trigonal bipyramid                 | 22.256       |

## Electronic Supporting Information

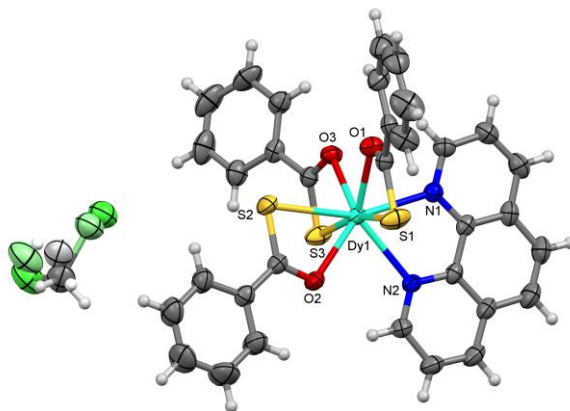

**Figure S1.** Partially labelled molecular structure of **1** with ellipsoids indicating the atomic displacement parameters (ADPs) for each atom in the structure. Colour code: Dy – cyan; O – red; S – yellow; N – blue; Cl – green; H – white.

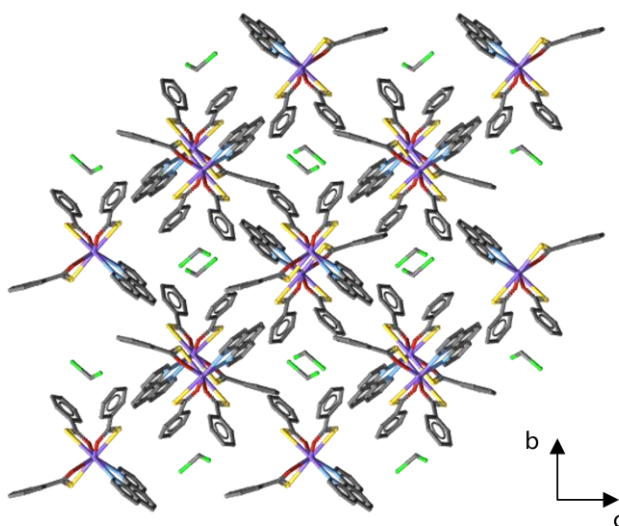

**Figure S2.** Molecular stacking seen along **a**. Colour code: Dy – purple; C – grey; O – red; S – yellow; N – blue; Cl – green.

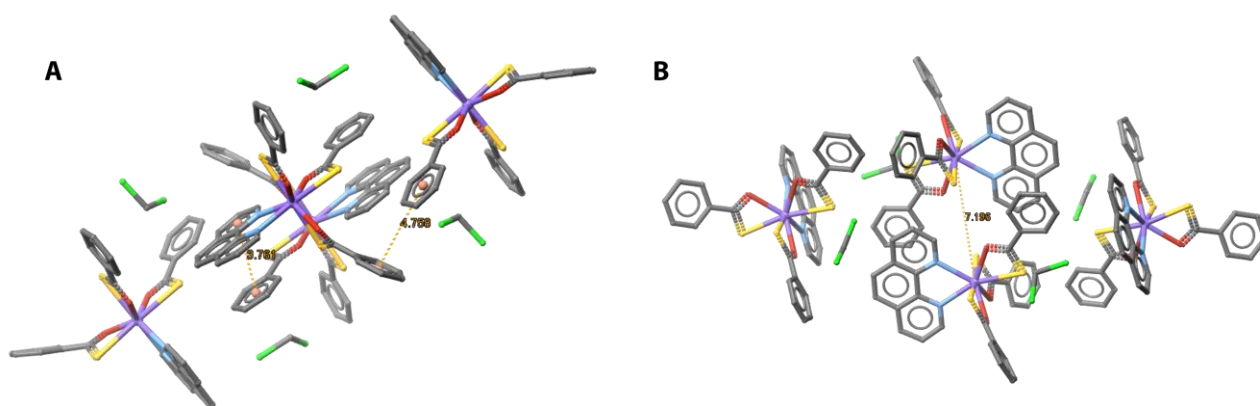

**Figure S3.** **A)** Shortest  $\pi\cdots\pi$  distances in face-to-face and edge-to-face configurations. **B)** Shortest intramolecular Dy $\cdots$ Dy distance. Colour code: Dy – purple; C – grey; O – red; S – yellow; N – blue; Cl – green; centroids – orange.

Electronic Supporting Information

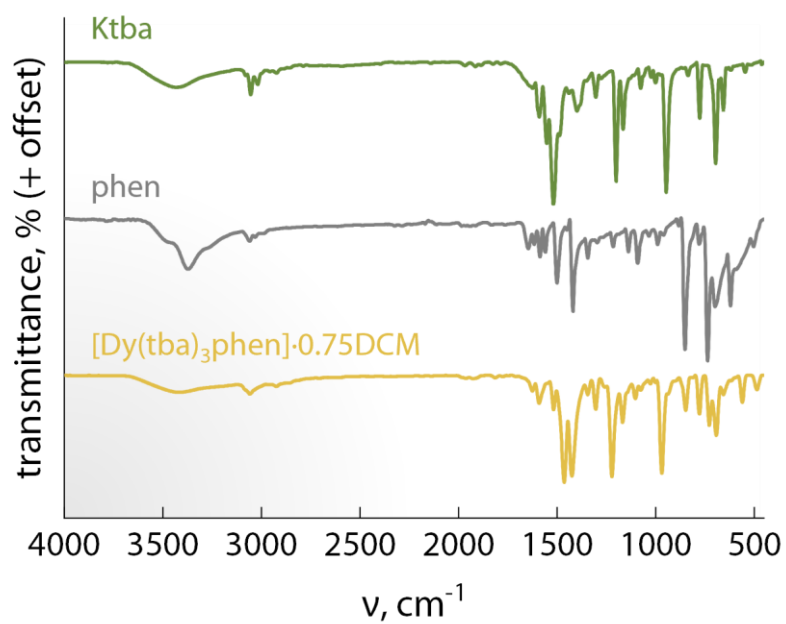

**Figure S4.** Fourier-transform infrared spectra of  $[\text{Dy}(\text{tba})_3\text{phen}]\cdot\text{CH}_2\text{Cl}_2$  (yellow) along with the ones of pristine ligands (Ktba – green -- and phen – grey).

## 3. Additional magnetic data

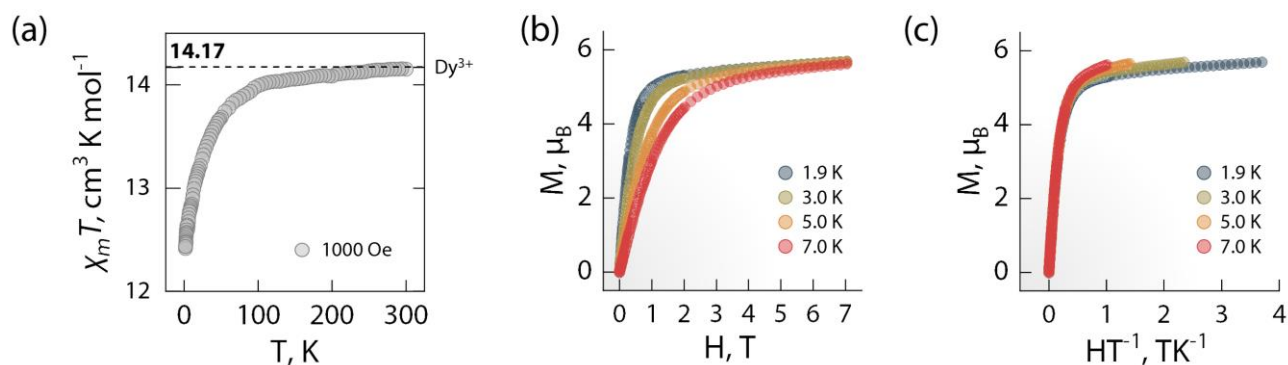

**Figure S5.** **a)** dc susceptibility of **1** under an applied field of 1000 Oe as a function of the temperature. **b)** Magnetization and **c)** reduced magnetization curves of **1** at the indicated temperatures.

**Table S3:** Best-fit parameters to the generalized Debye model for the temperature dependence of the the out-of-phase ( $\chi''$ ) magnetic susceptibility for **1**. Data collected without an external magnetic field.

| T, K | $\chi_s$ | $\chi_t$ | $\alpha$ | $\tau$   |
|------|----------|----------|----------|----------|
| 12   | 1.00E-05 | 2.11349  | 0.06399  | 5.41E-05 |
| 11   | 0.01568  | 2.2479   | 0.04843  | 1.21E-04 |
| 10   | 0.00513  | 2.47193  | 0.05015  | 2.70E-04 |
| 9.5  | 0.00411  | 2.61084  | 0.05987  | 4.05E-04 |
| 9    | 0.02975  | 2.77184  | 0.06209  | 6.21E-04 |
| 8.5  | 0.00459  | 2.86803  | 0.05422  | 9.58E-04 |
| 8    | 0.06238  | 3.12795  | 0.06503  | 0.00143  |
| 7.5  | 0.26338  | 2.98662  | 0.01602  | 0.00248  |
| 7    | 0.25775  | 3.04713  | 0.00651  | 0.00387  |
| 6.5  | 0.24536  | 3.32955  | 0.01516  | 0.00583  |
| 6    | 16.41996 | 19.58    | 0.0089   | 0.00932  |
| 5.5  | 16.81379 | 20.18621 | 0.0135   | 0.01492  |
| 5    | 17.2497  | 20.7503  | 0.01     | 0.0252   |
| 4.5  | 17.62756 | 21.37244 | 0.01756  | 0.04261  |
| 4    | 17.9918  | 22.0082  | 0.02822  | 0.07499  |
| 3.5  | 18.31731 | 22.68269 | 0.04985  | 0.13177  |
| 3    | 18.55916 | 23.44084 | 0.09233  | 0.22485  |
| 2.5  | 18.37734 | 24.36032 | 0.15305  | 0.34983  |
| 2    | 23.60645 | 31.54193 | 0.18362  | 0.48834  |
| 1.8  | 7.02063  | 16.22137 | 0.20251  | 0.55793  |

## Electronic Supporting Information

**Table S4:** Best-fit parameters to the generalized Debye model for the temperature dependence of the the out-of-phase ( $\chi''$ ) magnetic susceptibility for **1**. Data collected with an applied field of 500 Oe.

| T, K | $\chi_s$ | $\chi_t$ | $\alpha$ | $\tau$   |
|------|----------|----------|----------|----------|
| 12   | 0.06203  | 2.89138  | 0.06945  | 6.52E-05 |
| 11   | 6.78E-04 | 3.00384  | 0.05583  | 1.51E-04 |
| 10   | 0.00669  | 3.42967  | 0.06691  | 3.52E-04 |
| 9.5  | 0.0108   | 3.64246  | 0.07215  | 5.57E-04 |
| 9    | 0.03495  | 3.90544  | 0.07814  | 8.76E-04 |
| 8.5  | 0.04984  | 4.17115  | 0.08125  | 0.00139  |
| 8    | 0.0017   | 4.40569  | 0.07599  | 0.00221  |
| 7.5  | 0.07321  | 4.79185  | 0.07847  | 0.00353  |
| 7    | 0.0073   | 5.09198  | 0.07605  | 0.00566  |
| 6.5  | 0.00385  | 5.50336  | 0.07557  | 0.00931  |
| 6    | 0.0044   | 6.00903  | 0.078    | 0.01566  |
| 5.5  | 0.027    | 6.61372  | 0.08081  | 0.02776  |
| 5    | 0.34632  | 7.67348  | 0.08686  | 0.05186  |
| 4.5  | 0.54604  | 8.80675  | 0.09607  | 0.10474  |
| 4    | 0.95264  | 10.46428 | 0.11399  | 0.19558  |
| 3.5  | 0.00819  | 11.52743 | 0.15657  | 0.48014  |

## Electronic Supporting Information

**Table S5:** Best-fit parameters to the generalized Debye model for the field dependence of the the out-of-phase ( $\chi''$ ) magnetic susceptibility for **1**. Data collected at 5 K.

| $H, \text{Oe}$ | $\chi_s$ | $\chi_t$ | $\alpha$ | $\tau$  |
|----------------|----------|----------|----------|---------|
| 0              | 0.0332   | 4.97094  | 0.17564  | 0.01272 |
| 50             | 0.02635  | 4.98097  | 0.17722  | 0.01288 |
| 100            | 0.09357  | 5.05704  | 0.17715  | 0.01417 |
| 150            | 0.03752  | 5.14345  | 0.14336  | 0.0171  |
| 200            | 0.08807  | 5.05941  | 0.16018  | 0.01918 |
| 250            | 0.04823  | 5.03344  | 0.1467   | 0.02216 |
| 300            | 0.0087   | 5.0031   | 0.1319   | 0.02497 |
| 350            | 0.00973  | 5.04137  | 0.12325  | 0.02732 |
| 400            | 3.03E-04 | 5.05705  | 0.11404  | 0.02932 |
| 450            | 2.30E-04 | 5.07302  | 0.10652  | 0.03092 |
| 500            | 0.02094  | 5.11236  | 0.10285  | 0.03194 |
| 600            | 0.28487  | 5.39043  | 0.09899  | 0.03286 |
| 800            | 0.00258  | 5.07976  | 0.10612  | 0.03183 |
| 1000           | 0.01589  | 5.03627  | 0.10985  | 0.03113 |
| 1200           | 0.23753  | 5.26136  | 0.1075   | 0.0329  |
| 1400           | 0.00217  | 5.01615  | 0.10828  | 0.03448 |
| 1600           | 0.16032  | 5.13858  | 0.10972  | 0.03489 |
| 1800           | 0.11517  | 5.01962  | 0.11027  | 0.03445 |
| 2000           | 0.02527  | 4.90878  | 0.12333  | 0.03334 |
| 2200           | 0.0038   | 4.84639  | 0.13426  | 0.0323  |
| 2400           | 0.00697  | 4.73609  | 0.13535  | 0.03109 |
| 2600           | 0.00849  | 4.67675  | 0.14715  | 0.0295  |
| 2800           | 0.01473  | 4.64196  | 0.16434  | 0.02746 |
| 3000           | 0.00293  | 4.50445  | 0.16798  | 0.02601 |
| 3500           | 0.00726  | 4.29793  | 0.19796  | 0.02156 |
| 4000           | 0.0217   | 4.07991  | 0.23003  | 0.01741 |
| 4500           | 0.01884  | 3.85089  | 0.26488  | 0.01365 |
| 5000           | 7.70E-04 | 3.56714  | 0.29313  | 0.01067 |



**Table S6.** Summary of the fitting parameters of the temperature-dependence of the magnetization relaxation times ( $\tau$ ) for **1**.

| Mechanism | Parameter        | 0 Oe                                      | 500 Oe                                    |
|-----------|------------------|-------------------------------------------|-------------------------------------------|
| Orbach    | $U_{\text{eff}}$ | 136.8 K                                   | 138.2 K                                   |
|           | $\tau_0^{-1}$    | $1.02 \times 10^{-9}$ s                   | $1.01 \times 10^{-9}$ s                   |
| Raman     | $C$              | $2.67 \times 10^{-3}$ s $^{-1}$ K $^{-n}$ | $1.11 \times 10^{-3}$ s $^{-1}$ K $^{-n}$ |
|           | $n$              | 5.97                                      | 6.21                                      |
| QTM       | $B_1$            | $5$ s $^{-1}$                             | -                                         |
|           | $B_2$            | -                                         | -                                         |

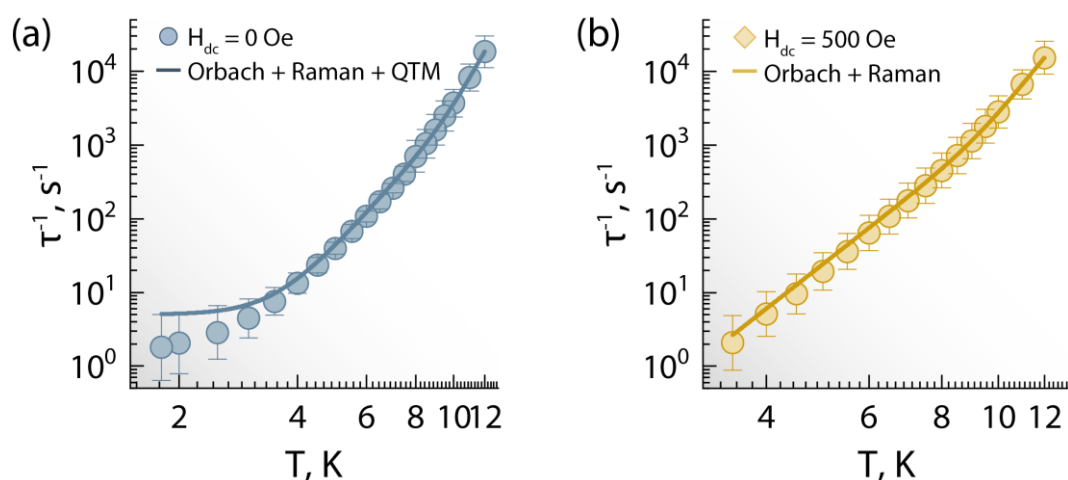**Figure S6.** Temperature dependence of the relaxation times of the magnetization ( $\tau^{-1}$ ) in the absence (a) and presence (b, 500 Oe) of a magnetic field with the respective estimated standard deviations for the relaxation processes. The estimated standard deviations of the relaxation time (vertical solid bars) have been calculated from the  $\alpha$ -parameters of the generalized Debye fits and the log-normal distribution as described in reference [2].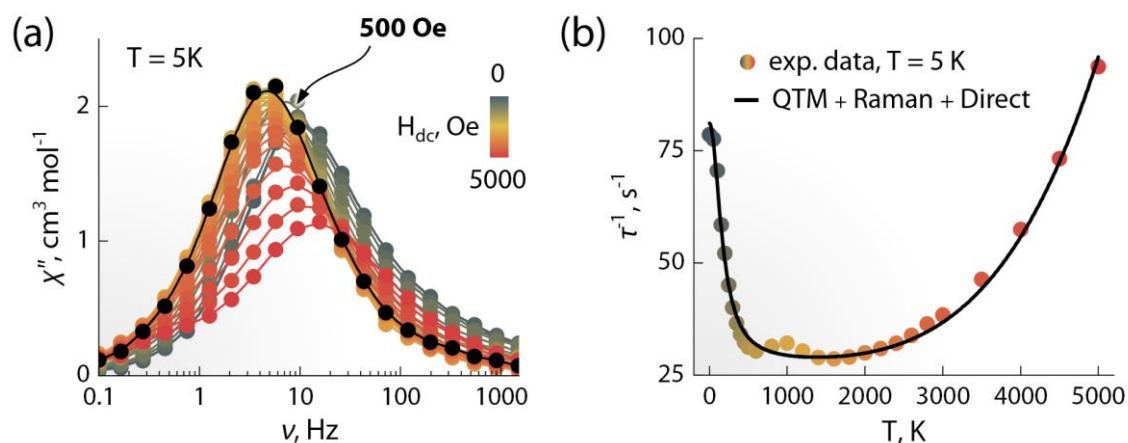**Figure S7. a)** Frequency dependence of the out-of-phase ( $\chi''$ ) magnetic susceptibility obtained at 5 K as a function of the applied field. Highlighted in black is the dataset obtained at 500 Oe. **b)** Field dependence of the magnetic relaxation times ( $\tau$ ) measured at 5 K. Black solid line is the best fit to the experimental data using eq. 2 in the main manuscript. Best-fit parameters are summarized in **Table S7**.

**Table S7.** Summary of the fitting parameters of the field-dependence of the magnetization relaxation times ( $\tau$ ) for **1** obtained at 5 K.

| <b>Mechanism</b> | <b>Parameter</b> | <b>5 K</b>                                                           |
|------------------|------------------|----------------------------------------------------------------------|
| Direct           | $A$              | $2.17 \times 10^{-14} \text{ s}^{-1} \text{ Oe}^{-4} \text{ K}^{-1}$ |
| Raman            | $C$              | $1.87 \times 10^{-3} \text{ s}^{-1} \text{ K}^n$                     |
|                  | $n$              | 5.97                                                                 |
| QTM              | $B_1$            | $53.30 \text{ s}^{-1}$                                               |
|                  | $B_2$            | $3.39 \times 10^{-5} \text{ T}^{-2}$                                 |

#### 4. Mathematical treatment of luminescence thermometry data

The proposed thermometric approach is a so-called ratiometric method, wherein the thermometric parameter ( $\Delta$ ) is the ratio between the integrated intensity of the luminescence over conveniently defined wavelength ranges. In this study, the integrated signals were obtained over the ranges 571.3-572.1 nm ( $I_1$ ) and 567.2-570.3 nm ( $I_2$ ), and  $\Delta = I_2/I_1$ .

The experimental dataset was fit to a parabolic function of the type  $\Delta(T) = \mathbf{A} + \mathbf{B}\cdot T + \mathbf{C}\cdot T^2$  obtaining the values reported in **Table S8** for the three parameters **A**, **B**, and **C**.

**Table S8.** Summary of parabolic fit parameters of the experimentally obtained calibration curve.

| Parameter            | Value (error on the last digit) |
|----------------------|---------------------------------|
| <b>A</b>             | 0.443(5)                        |
| <b>B</b>             | 0.0017(4)                       |
| <b>C</b>             | 0.000055(7)                     |
| <b>R<sup>2</sup></b> | 0.998                           |

This parabolic function  $\Delta(T)$  was used to determine the relative thermal sensitivity as described in Equation 3 in the main manuscript, which we report here below:

$$S_r = \frac{1}{\Delta(T)} \frac{\partial \Delta(T)}{\partial T} \quad (\text{S1})$$

The relative thermal sensitivity was then employed to retrieve the temperature uncertainty  $\delta T(T)$ . Following the guidelines provided by Brites et al.,<sup>3</sup> we first calculated the uncertainty over the determination of  $\Delta$  ( $\delta\Delta$ ) considering the fluctuations of the recorded spectra ( $\delta I$ ) in the 555-560 nm range (where no Dy<sup>3+</sup> emission is observed). A standard deviation of approximately 0.001 was observed in all cases for the normalized spectra, which was considered as  $\delta I$ . In the case of a ratiometric approach, one could consider that:

$$\frac{\delta\Delta}{\Delta} = \sqrt{\left(\frac{\delta I_1}{I_1}\right)^2 + \left(\frac{\delta I_2}{I_2}\right)^2} = \sqrt{2} \frac{\delta I}{I} \quad (\text{S2})$$

Where the leftmost approximation assumes that the relative uncertainties for  $I_1$  and  $I_2$  are similar. In this case,  $\delta I/I$  is 0.001, since it is obtained by dividing  $\delta I$  by the maximum intensity value (i.e., 1 for the normalized spectra). Finally, since the temperature readout uncertainty is a function of the uncertainty over the thermometric parameter:

$$\delta T(T) = \frac{1}{S_r(T)} \frac{\delta\Delta}{\Delta} \quad (\text{S3})$$

Combining Equations S2 and S3,  $\delta T(T)$  can be calculated as:

$$\delta T(T) = \frac{1}{S_r(T)} \sqrt{2} \frac{\delta I}{I} \quad (\text{S4})$$

Which returns the continuous function shown as a grey line in **Figure 4c** of the main manuscript.

## Electronic Supporting Information

The repeatability (R) of the thermometric approach was calculated considering the results of three independent sets of measurements at 10 and 50 K, and using the equation:

$$R = 1 - \frac{\max(|\Delta_i - \Delta_c|)}{\Delta_c} \quad (S5)$$

Where  $\Delta_i$  is the thermometric parameter obtained for the i-th measurement and  $\Delta_c$  is the thermal parameter extracted from the calibration curve. The values for the determination of the repeatability are reported in **Table S9**.

**Table S9.** Values of the thermometric parameter  $\Delta$  obtained at 10 and 50 K from the three cycles, and from the calibration curve.

|                    | T    | $\Delta$ |
|--------------------|------|----------|
| <b>Cycle 1</b>     | 10 K | 0.468    |
|                    | 50 K | 0.662    |
| <b>Cycle 2</b>     | 10 K | 0.471    |
|                    | 50 K | 0.664    |
| <b>Cycle 3</b>     | 10 K | 0.469    |
|                    | 50 K | 0.668    |
| <b>Calibration</b> | 10 K | 0.466    |
|                    | 50 K | 0.666    |

## 5. Computational details, data, and additional discussion

All density function theory (DFT) calculations were performed with Gaussian16.<sup>3</sup> The starting geometries for the model systems **1<sub>o</sub>**, **1<sub>s</sub>**, **1<sub>se</sub>**, and **1<sub>te</sub>** were constructed from the crystal structure of **1** by replacing sulfur atoms with oxygen (**1<sub>o</sub>**), selenium (**1<sub>se</sub>**), tellurium (**1<sub>te</sub>**) or without any modification (**1<sub>s</sub>**). A full geometry optimization in the gas-phase was carried out for all model systems (**1<sub>o</sub>**, **1<sub>s</sub>**, **1<sub>se</sub>**, and **1<sub>te</sub>**) using the PBE1PBE exchange-correlation functional<sup>4,5</sup> in combination with Grimme's dispersion correction (D3)<sup>6</sup> with Becke-Johnson damping factor,<sup>7</sup> whereas for **1** only a partial geometry optimization was performed using the same computational method. In the partial geometry optimization, only the positions of hydrogen atoms of **1** were optimized while all other atoms were frozen to their corresponding crystal structure coordinates. The comparison of results obtained for **1** and **1<sub>s</sub>** helps to understand the influence of gas-phase optimization on the geometries and microscopic magnetic properties of model systems. As shown below the geometries and magnetic properties of **1<sub>s</sub>** (gas-phase) and **1** (crystal structure) are not identical but very similar (**Table S10, S14, S17, S19, S22, and S23** as well as **Figure S7 and S8**). The similar results obtained for **1<sub>s</sub>** and **1** underpin the reliability of the computational results calculated for **1<sub>o</sub>**, **1<sub>se</sub>**, and **1<sub>te</sub>** for which no solid-state structures exist yet. The geometry of **1<sub>s</sub>** was also optimized without the dispersion correction to investigate the effect of dispersion force on the geometry of **1<sub>s</sub>**. Because the geometry optimizations without and with the dispersion correction gave similar geometries for **1<sub>s</sub>** (**Table S10**), no geometries of other model systems were optimized without the dispersion correction. In the DFT calculations, triple-zeta valence plus polarization (TZVP) basis sets were used for all atoms,<sup>8,9</sup> except for Dy, for which the polarized double-zeta valence quality was applied.<sup>10</sup> The core electrons of Dy atom were described with the relativistic effective core potential developed by Cundari and Stevens. The subsequent single point energy calculations were done for the optimized structures using the PBE1PBE-D3 exchange-correlation functional in conjunction with all electron basis sets for all atoms.<sup>11</sup> In the single point energy calculations, the scalar relativistic effects were treated using the Douglas-Kroll-Hess Hamiltonian as implemented in Gaussian 16.

The quantum theory of atoms in molecules (QTAIM) analyses were performed for **1**, **1<sub>o</sub>**, **1<sub>s</sub>**, **1<sub>se</sub>**, and **1<sub>te</sub>** using the electron densities obtained from the single point energy calculations described above.<sup>12</sup> AIMALL software package was used for the QTAIM analyses.<sup>13</sup> The QTAIM analysis is based on the topology of the total electron density of a molecular system, and it provides a way for analyzing and classifying the nature of chemical bonds and interactions in the molecular system.<sup>12</sup> In the QTAIM, the molecular system is partitioned into set of atomic basins. The basins are defined by a surface satisfying the zero-flux condition; the dot product of the gradient of the electron density,  $\rho(\mathbf{r})$ , and a unit vector,  $\mathbf{n}(\mathbf{r})$ , normal to the surface at the given point must equal to zero. The points where the gradient of the electron density,  $\nabla\rho(\mathbf{r})$ , vanishes are called the critical points. They can be classified into the nuclear, bond, ring or cage critical points depending on their character. Among them, the bond critical point is the most useful in quantifying bond character and interactions in the molecular system. It has been proven that when  $\rho(\mathbf{r}) > 0.2$  a.u. and  $\nabla^2\rho(\mathbf{r}) < 0$  at the bond critical point, the interaction can be interpreted as a covalent interaction, whereas  $\rho(\mathbf{r}) < 0.1$  a.u. with  $\nabla^2\rho(\mathbf{r}) > 0$  represents an ionic, van der Waals, or hydrogen bonding interaction.<sup>14</sup> According to this rule, Dy-O, Dy-N, and Dy-E (E = O, S, Se, Te) bonds can be classified as ionic bonds (**Table S23**). Further inspection of the data reveals that the ionic character of Dy-E bonds decreases when descending the chalcogen group due to the more diffuse nature of frontier orbitals of heavier chalcogen atoms. This is also proven by the calculated delocalization indexes (DI) that measures the degree of electron-sharing between two atoms (**Table S23**).<sup>12</sup>

To evaluate the energies of the first excited singlet and triplet states of coordinated ligands  $\text{C}_6\text{H}_5\text{COO}^-$  (ba<sup>-</sup>),  $\text{C}_6\text{H}_5\text{COS}^-$  (tba<sup>-</sup>),  $\text{C}_6\text{H}_5\text{COSe}^-$  (seba<sup>-</sup>),  $\text{C}_6\text{H}_5\text{COTe}^-$  (teba<sup>-</sup>) and phen, time-dependent density functional theory (TD-DFT) calculations were performed for ligands at the CAM-B3LYP<sup>15</sup> and LC- $\omega$ PBE<sup>16-18</sup> level of theories along with three different basis sets, namely TZVP<sup>8,9</sup> (only for tba<sup>-</sup>), Def2-TZVPP and Def2-QZVPPD, to evaluate the basis set dependence on the energy of the calculated states.<sup>19</sup> Because the results obtained

for tba<sup>-</sup> with TZVP and Def2-TZVPP basis sets were similar (**Table S24**), no TZVP basis set was used with any other ligands. Prior to the TD-DFT calculations, the geometries of ligands were optimized to their ground states using the same exchange-correlation functionals and Def2-TZVPP basis set. Electronic transitions to the singlet and triplet states were treated as vertical excitations from the ground state.

The complete active space self-consistent field (CASSCF)<sup>20-22</sup> approach in combination with the restricted active space state interaction (RASSI)<sup>23-25</sup> method was employed to calculate the energies of the spin-orbit states for **1**, **1<sub>o</sub>**, **1<sub>s</sub>**, **1<sub>se</sub>**, and **1<sub>Te</sub>**. OpenMolcas (version 19.11) was used to perform all CASSCF/RASSI calculations.<sup>26</sup> In CASSCF/RASSI calculations, the relativistic contracted natural atomic orbital (ANO-RCC) basis set with the polarized triple-zeta valence quality (ANO-RCC-TZVP) and polarized double-zeta valence quality (ANO-RCC-TZVP) were applied for Dy and all other atoms, respectively.<sup>27,28</sup> In state-averaged CASSCF calculations, all sextet, quartet and doublet states of Dy(III) ion generated by nine electrons in seven orbitals were solved. In the subsequent RASSI calculations, the 21 sextets, 128 quartets and 130 doublets were mixed by the spin-orbit coupling. Cholesky decomposition with a threshold value of 10<sup>-8</sup> was used to reduce the computational time, whereas the relativistic effect was treated using the exact two component (X2C) transformation.<sup>29-31</sup> The **g**-tensors, crystal field parameters and qualitative energy barrier for **1**, **1<sub>o</sub>**, **1<sub>s</sub>**, **1<sub>se</sub>**, and **1<sub>Te</sub>** were extracted from the CASSCF/RASSI wavefunctions utilizing the SINGLE\_ANISO program package.<sup>32-34</sup> The effective charges of coordinating atoms were calculated with the LoProp program.<sup>35</sup>

Although the CASSCF/RASSI level of theory predicted the splitting of the ground multiplet <sup>6</sup>H<sub>15/2</sub> well for **1**, the calculated splitting and absolute values of the excited multiplets <sup>6</sup>H<sub>13/2</sub> and <sup>4</sup>F<sub>9/2</sub> deviated from the experimental results (**Table S12**, **Figure S9** and **S10**). This is a well-known problem of the CASSCF method and because of this, we only analyzed the general trends not absolute values in the thermometric performance simulations.

## Electronic Supporting Information

**Table S10.** Selected bond lengths (Å) and angles (°) for the crystal structure and gas-phase optimized structure of **1<sub>s</sub>** at the PBE1PBE-D3/TZVP<sup>a</sup> and PBE1PBE/TZVP<sup>b</sup> levels of theory and their difference (Exp-Cal) with mean absolute errors (MAE).

| Bond           | Crys. Struct. | 1 <sub>s</sub> <sup>a</sup> | Exp-Cal <sup>a</sup> | 1 <sub>s</sub> <sup>b</sup> | Exp-Cal <sup>b</sup> |
|----------------|---------------|-----------------------------|----------------------|-----------------------------|----------------------|
| C1 – Dy1       | 2.906         | 2.960                       | 0.054                | 2.960                       | 0.054                |
| C8 – Dy1       | 2.937         | 2.935                       | 0.002                | 2.955                       | 0.018                |
| C15 – Dy1      | 2.910         | 2.956                       | 0.046                | 2.960                       | 0.050                |
| N1 – Dy1       | 2.478         | 2.526                       | 0.048                | 2.543                       | 0.065                |
| N2 – Dy1       | 2.525         | 2.550                       | 0.025                | 2.571                       | 0.046                |
| O1 – Dy1       | 2.342         | 2.385                       | 0.043                | 2.371                       | 0.029                |
| O2 – Dy1       | 2.341         | 2.361                       | 0.020                | 2.383                       | 0.042                |
| O3 – Dy1       | 2.371         | 2.377                       | 0.006                | 2.372                       | 0.001                |
| S1 – Dy1       | 2.796         | 2.845                       | 0.049                | 2.858                       | 0.062                |
| S2 – Dy1       | 2.836         | 2.817                       | 0.019                | 2.833                       | 0.003                |
| S3 – Dy1       | 2.818         | 2.846                       | 0.029                | 2.858                       | 0.041                |
| <b>MAE</b>     |               |                             | 0.031                |                             | 0.037                |
| Angle          | Crys. Struct. | 1 <sub>s</sub> <sup>a</sup> | Exp-Cal <sup>a</sup> | 1 <sub>s</sub> <sup>b</sup> | Exp-Cal <sup>b</sup> |
| C26 – N1 – Dy1 | 119.90        | 119.76                      | 0.14                 | 120.01                      | 0.11                 |
| C30 – N2 – Dy1 | 118.40        | 118.76                      | 0.36                 | 118.88                      | 0.48                 |
| C1 – O1 – Dy1  | 103.60        | 104.48                      | 0.88                 | 105.16                      | 1.56                 |
| C8 – O2 – Dy1  | 105.10        | 104.05                      | 1.05                 | 104.12                      | 0.98                 |
| C15 – O3 – Dy1 | 102.10        | 104.73                      | 2.63                 | 105.13                      | 3.03                 |
| C1 – S1 – Dy1  | 76.11         | 76.41                       | 0.30                 | 76.03                       | 0.08                 |
| C8 – S2 – Dy1  | 76.13         | 76.44                       | 0.31                 | 76.67                       | 0.54                 |
| C15 – S3 – Dy1 | 75.75         | 76.23                       | 0.48                 | 76.06                       | 0.31                 |
| N1 – Dy1 – N2  | 65.58         | 64.73                       | 0.85                 | 64.29                       | 1.29                 |
| N1 – Dy1 – S1  | 91.50         | 82.30                       | 9.20                 | 85.57                       | 5.93                 |
| N1 – Dy1 – S2  | 157.81        | 158.91                      | 1.10                 | 160.21                      | 2.40                 |
| N1 – Dy1 – S3  | 92.78         | 83.10                       | 9.68                 | 84.19                       | 8.59                 |
| N2 – Dy1 – S1  | 85.57         | 78.74                       | 6.83                 | 79.13                       | 6.44                 |
| N2 – Dy1 – S2  | 136.50        | 136.35                      | 0.15                 | 135.49                      | 1.01                 |
| N2 – Dy1 – S3  | 84.97         | 78.05                       | 6.92                 | 79.44                       | 5.53                 |
| O1 – Dy1 – N1  | 79.07         | 75.94                       | 3.13                 | 76.94                       | 2.13                 |
| O1 – Dy1 – N2  | 129.41        | 125.12                      | 4.29                 | 124.21                      | 5.20                 |
| O1 – Dy1 – O3  | 74.78         | 76.98                       | 2.20                 | 78.68                       | 3.90                 |
| O1 – Dy1 – S1  | 59.45         | 58.71                       | 0.74                 | 58.56                       | 0.89                 |
| O1 – Dy1 – S2  | 82.03         | 87.35                       | 5.32                 | 88.06                       | 6.03                 |
| O1 – Dy1 – S3  | 133.55        | 134.48                      | 0.93                 | 136.16                      | 2.61                 |
| O2 – Dy1 – N1  | 143.19        | 141.75                      | 1.44                 | 140.89                      | 2.30                 |
| O2 – Dy1 – N2  | 77.69         | 77.06                       | 0.63                 | 76.62                       | 1.07                 |
| O2 – Dy1 – O1  | 126.44        | 129.50                      | 3.06                 | 130.59                      | 4.15                 |
| O2 – Dy1 – O3  | 128.14        | 131.85                      | 3.71                 | 129.03                      | 0.89                 |
| O2 – Dy1 – S1  | 82.97         | 88.88                       | 5.91                 | 88.38                       | 5.41                 |
| O2 – Dy1 – S2  | 58.81         | 59.31                       | 0.50                 | 58.88                       | 0.07                 |
| O2 – Dy1 – S3  | 86.22         | 91.04                       | 4.82                 | 87.75                       | 1.53                 |
| O3 – Dy1 – N1  | 80.44         | 75.84                       | 4.60                 | 77.28                       | 3.16                 |
| O3 – Dy1 – N2  | 128.90        | 124.17                      | 4.73                 | 125.35                      | 3.55                 |
| O3 – Dy1 – S1  | 134.21        | 134.19                      | 0.02                 | 136.59                      | 2.38                 |
| O3 – Dy1 – S2  | 83.48         | 88.07                       | 4.59                 | 87.27                       | 3.79                 |
| O3 – Dy1 – S3  | 58.77         | 58.73                       | 0.04                 | 58.56                       | 0.21                 |
| S1 – Dy1 – S2  | 88.82         | 100.10                      | 11.28                | 97.66                       | 8.84                 |
| S1 – Dy1 – S3  | 166.93        | 156.19                      | 10.74                | 158.54                      | 8.39                 |
| S3 – Dy1 – S2  | 91.85         | 100.30                      | 8.45                 | 98.35                       | 6.50                 |
| <b>MAE</b>     |               |                             | <b>3.39</b>          |                             | <b>3.09</b>          |

**Table S11.** Selected bond lengths (Å) and angles (°) for **1<sub>o</sub>**, **1<sub>se</sub>**, and **1<sub>Te</sub>** at the PBE1PBE-D3/TZV level of theory.

| <b>Bond length</b>               | <b>1<sub>o</sub></b> | <b>1<sub>se</sub></b> | <b>1<sub>Te</sub></b> |
|----------------------------------|----------------------|-----------------------|-----------------------|
| C1 – Dy1 (C1 – Dy 65)            | 2.747                | 3.014                 | 3.087                 |
| C8 – Dy1 (C13 – Dy65)            | 2.741                | 2.994                 | 3.064                 |
| C15 – Dy1 (C25 – Dy65)           | 2.747                | 3.015                 | 3.083                 |
| N1 – Dy1 (N57 – Dy65)            | 2.450                | 2.514                 | 2.517                 |
| N2 – Dy1 (N58 – Dy65)            | 2.550                | 2.561                 | 2.552                 |
| O1 – Dy1 (O59 – Dy65)            | 2.384                | 2.399                 | 2.383                 |
| O2 – Dy1 (O60 – Dy65)            | 2.389                | 2.373                 | 2.366                 |
| O3 – Dy1 (O61 – Dy65)            | 2.385                | 2.402                 | 2.385                 |
| E1 – Dy1 (E62 – Dy65)            | 2.395                | 2.954                 | 3.187                 |
| E2 – Dy1 (E63 – Dy65)            | 2.370                | 2.941                 | 3.164                 |
| E3 – Dy1 (E64 – Dy65)            | 2.392                | 2.952                 | 3.176                 |
| <b>Angle</b>                     |                      |                       |                       |
| N1 – Dy1 – N2 (N57 – Dy65 – N58) | 64.51                | 64.83                 | 64.91                 |
| N1 – Dy1 – E1 (N57 – Dy65 – E62) | 80.98                | 83.81                 | 83.82                 |
| N1 – Dy1 – E2 (N57 – Dy65 – E63) | 163.18               | 158.40                | 157.61                |
| N1 – Dy1 – E3 (N57 – Dy65 – E64) | 80.28                | 84.05                 | 85.90                 |
| N2 – Dy1 – E1 (N58 – Dy65 – E62) | 78.04                | 78.60                 | 79.54                 |
| N2 – Dy1 – E2 (N58 – Dy65 – E63) | 132.15               | 136.77                | 137.44                |
| N2 – Dy1 – E3 (N58 – Dy65 – E64) | 77.13                | 78.57                 | 78.23                 |
| O1 – Dy1 – N1 (O59 – Dy65 – N57) | 76.34                | 75.81                 | 76.38                 |
| O1 – Dy1 – N2 (O59 – Dy65 – N58) | 122.52               | 125.15                | 127.00                |
| O1 – Dy1 – O3 (O59 – Dy65 – O61) | 83.81                | 75.75                 | 74.30                 |
| O1 – Dy1 – E1 (O59 – Dy65 – E62) | 54.79                | 59.93                 | 60.93                 |
| O1 – Dy1 – E2 (O59 – Dy65 – E63) | 89.92                | 87.32                 | 86.24                 |
| O1 – Dy1 – S3 (O59 – Dy65 – E64) | 136.41               | 134.67                | 134.92                |
| O2 – Dy1 – N1 (O60 – Dy65 – N57) | 141.73               | 141.30                | 140.84                |
| O2 – Dy1 – N2 (O60 – Dy65 – N58) | 77.24                | 76.47                 | 76.10                 |
| O2 – Dy1 – O1 (O60 – Dy65 – O59) | 127.64               | 131.15                | 129.20                |
| O2 – Dy1 – O3 (O60 – Dy65 – O61) | 129.77               | 131.63                | 134.39                |
| O2 – Dy1 – E1 (O60 – Dy65 – E62) | 90.47                | 88.55                 | 85.80                 |
| O2 – Dy1 – E2 (O60 – Dy65 – E63) | 54.93                | 60.30                 | 61.52                 |
| O2 – Dy1 – E3 (O60 – Dy65 – E64) | 92.79                | 88.80                 | 89.83                 |
| O3 – Dy1 – N1 (O61 – Dy65 – N57) | 75.75                | 75.65                 | 75.59                 |
| O3 – Dy1 – N2 (O61 – Dy65 – N58) | 121.74               | 124.90                | 124.60                |
| O3 – Dy1 – S1 (O61 – Dy65 – E62) | 136.35               | 134.54                | 134.00                |
| O3 – Dy1 – S2 (O61 – Dy65 – E63) | 93.38                | 87.30                 | 86.29                 |
| O3 – Dy1 – S3 (O61 – Dy65 – E64) | 54.80                | 59.94                 | 61.14                 |
| E1 – Dy1 – E2 (E62 – Dy65 – E63) | 99.16                | 99.49                 | 100.11                |
| E1 – Dy1 – E3 (E62 – Dy65 – E64) | 153.57               | 157.01                | 157.75                |
| E3 – Dy1 – E2 (E64 – Dy65 – E63) | 104.15               | 98.98                 | 96.90                 |



## Electronic Supporting Information

**Table S12.** Calculated energies ( $E$ ) for each KD arising from the crystal-field splitting of ground  ${}^6H_{15/2}$  and excited  ${}^6H_{13/2}$  and  ${}^4F_{9/2}$  multiplets of **1** as well as the eigenvalues of  $g$ -tensors for each KD arising from the crystal-field splitting of ground  ${}^6H_{15/2}$  multiplet and angle ( $\Theta$ ) between the ground KD and excited KD at the CASSCF/RASSI<sup>a</sup> level.

| ${}^6H_{15/2}$ |                                       |       |       |        |                       |
|----------------|---------------------------------------|-------|-------|--------|-----------------------|
| KD             | $E$ [ $\text{cm}^{-1}$ ] <sup>a</sup> | $g_x$ | $g_y$ | $g_z$  | $\Theta$ [ $^\circ$ ] |
| 1              | 0.000                                 | 0.001 | 0.001 | 19.832 | -                     |
| 2              | 107.555                               | 0.025 | 0.036 | 17.829 | 24.186                |
| 3              | 167.494                               | 1.127 | 1.703 | 14.000 | 5.524                 |
| 4              | 212.741                               | 1.395 | 3.047 | 11.023 | 14.929                |
| 5              | 257.954                               | 0.051 | 3.977 | 10.426 | 37.320                |
| 6              | 289.580                               | 3.245 | 6.371 | 11.909 | 80.625                |
| 7              | 436.649                               | 0.887 | 2.968 | 14.459 | 92.123                |
| 8              | 469.414                               | 0.548 | 3.891 | 15.847 | 93.416                |
| ${}^6H_{13/2}$ |                                       |       |       |        |                       |
| KD             | $E$ [ $\text{cm}^{-1}$ ] <sup>a</sup> | $g_x$ | $g_y$ | $g_z$  | $\Theta$ [ $^\circ$ ] |
| 1              | 3576.434                              | -     | -     | -      | -                     |
| 2              | 3642.338                              | -     | -     | -      | -                     |
| 3              | 3723.961                              | -     | -     | -      | -                     |
| 4              | 3799.689                              | -     | -     | -      | -                     |
| 5              | 3844.296                              | -     | -     | -      | -                     |
| 6              | 3878.530                              | -     | -     | -      | -                     |
| 7              | 3899.563                              | -     | -     | -      | -                     |
| ${}^4F_{9/2}$  |                                       |       |       |        |                       |
| KD             | $E$ [ $\text{cm}^{-1}$ ] <sup>a</sup> | $g_x$ | $g_y$ | $g_z$  | $\Theta$ [ $^\circ$ ] |
| 1              | 24573.046                             | -     | -     | -      | -                     |
| 2              | 24655.711                             | -     | -     | -      | -                     |
| 3              | 24676.906                             | -     | -     | -      | -                     |
| 4              | 24759.694                             | -     | -     | -      | -                     |
| 5              | 24787.026                             | -     | -     | -      | -                     |

## Electronic Supporting Information

**Table S13.** Calculated energies ( $E$ ) for each KD arising from the crystal-field splitting of ground  ${}^6H_{15/2}$  and excited  ${}^6H_{13/2}$  and  ${}^4F_{9/2}$  multiplets of  $\mathbf{1o}$  as well as the eigenvalues of  $\mathbf{g}$ -tensors for each KD arising from the crystal-field splitting of ground  ${}^6H_{15/2}$  multiplet and angle ( $\Theta$ ) between the ground KD and excited KD at the CASSCF/RASSI<sup>a</sup> level.

| ${}^6H_{15/2}$ |                        |                |                |                |                   |
|----------------|------------------------|----------------|----------------|----------------|-------------------|
| KD             | $E [\text{cm}^{-1}]^a$ | $\mathbf{g}_x$ | $\mathbf{g}_y$ | $\mathbf{g}_z$ | $\Theta [^\circ]$ |
| 1              | 0.000                  | 0.803          | 4.906          | 15.126         | -                 |
| 2              | 32.437                 | 1.139          | 2.774          | 11.402         | 85.732            |
| 3              | 78.240                 | 1.725          | 5.799          | 11.708         | 102.611           |
| 4              | 98.400                 | 0.384          | 2.189          | 15.060         | 67.536            |
| 5              | 133.220                | 1.319          | 4.249          | 10.746         | 107.079           |
| 6              | 200.515                | 1.072          | 3.019          | 14.009         | 92.309            |
| 7              | 225.164                | 0.439          | 1.807          | 17.410         | 131.399           |
| 8              | 291.843                | 0.270          | 0.405          | 19.298         | 49.073            |
| ${}^6H_{13/2}$ |                        |                |                |                |                   |
| KD             | $E [\text{cm}^{-1}]$   | $\mathbf{g}_x$ | $\mathbf{g}_y$ | $\mathbf{g}_z$ | $\Theta [^\circ]$ |
| 1              | 3582.440               | -              | -              | -              | -                 |
| 2              | 3611.957               | -              | -              | -              | -                 |
| 3              | 3637.386               | -              | -              | -              | -                 |
| 4              | 3654.396               | -              | -              | -              | -                 |
| 5              | 3675.603               | -              | -              | -              | -                 |
| 6              | 3699.270               | -              | -              | -              | -                 |
| 7              | 3746.220               | -              | -              | -              | -                 |
| ${}^4F_{9/2}$  |                        |                |                |                |                   |
| KD             | $E [\text{cm}^{-1}]$   | $\mathbf{g}_x$ | $\mathbf{g}_y$ | $\mathbf{g}_z$ | $\Theta [^\circ]$ |
| 1              | 24462.938              | -              | -              | -              | -                 |
| 2              | 24546.424              | -              | -              | -              | -                 |
| 3              | 24595.923              | -              | -              | -              | -                 |
| 4              | 24659.027              | -              | -              | -              | -                 |
| 5              | 24722.841              | -              | -              | -              | -                 |

## Electronic Supporting Information

**Table S14.** Calculated energies ( $E$ ) for each KD arising from the crystal-field splitting of ground  ${}^6H_{15/2}$  and excited  ${}^6H_{13/2}$  and  ${}^4F_{9/2}$  multiplets of  $1s$  as well as the eigenvalues of  $g$ -tensors for each KD arising from the crystal-field splitting of ground  ${}^6H_{15/2}$  multiplet and angle ( $\Theta$ ) between the ground KD and excited KD at the CASSCF/RASSI<sup>3</sup> level.

| ${}^6H_{15/2}$ |                                       |       |       |        |                       |
|----------------|---------------------------------------|-------|-------|--------|-----------------------|
| KD             | $E$ [ $\text{cm}^{-1}$ ] <sup>a</sup> | $g_x$ | $g_y$ | $g_z$  | $\Theta$ [ $^\circ$ ] |
| 1              | 0.000                                 | 0.003 | 0.004 | 19.767 | -                     |
| 2              | 103.187                               | 0.199 | 0.220 | 17.443 | 20.334                |
| 3              | 147.517                               | 1.993 | 2.896 | 12.819 | 4.630                 |
| 4              | 182.589                               | 1.189 | 2.575 | 11.437 | 26.282                |
| 5              | 200.935                               | 0.616 | 3.084 | 14.496 | 53.728                |
| 6              | 232.358                               | 3.266 | 6.470 | 10.822 | 94.314                |
| 7              | 376.476                               | 1.060 | 3.938 | 13.316 | 92.142                |
| 8              | 404.660                               | 0.648 | 5.028 | 14.880 | 89.925                |
| ${}^6H_{13/2}$ |                                       |       |       |        |                       |
| KD             | $E$ [ $\text{cm}^{-1}$ ]              | $g_x$ | $g_y$ | $g_z$  | $\Theta$ [ $^\circ$ ] |
| 1              | 3576.265                              | -     | -     | -      | -                     |
| 2              | 3625.209                              | -     | -     | -      | -                     |
| 3              | 3693.058                              | -     | -     | -      | -                     |
| 4              | 3756.239                              | -     | -     | -      | -                     |
| 5              | 3797.537                              | -     | -     | -      | -                     |
| 6              | 3827.499                              | -     | -     | -      | -                     |
| 7              | 3839.980                              | -     | -     | -      | -                     |
| ${}^4F_{9/2}$  |                                       |       |       |        |                       |
| KD             | $E$ [ $\text{cm}^{-1}$ ]              | $g_x$ | $g_y$ | $g_z$  | $\Theta$ [ $^\circ$ ] |
| 1              | 24557.522                             | -     | -     | -      | -                     |
| 2              | 24628.609                             | -     | -     | -      | -                     |
| 3              | 24661.553                             | -     | -     | -      | -                     |
| 4              | 24731.931                             | -     | -     | -      | -                     |
| 5              | 24755.892                             | -     | -     | -      | -                     |

**Table S15.** Calculated energies ( $E$ ) for each KD arising from the crystal-field splitting of ground  ${}^6H_{15/2}$  and excited  ${}^6H_{13/2}$  and  ${}^4F_{9/2}$  multiplets of  $1s_e$  as well as the eigenvalues of  $g$ -tensors for each KD arising from the crystal-field splitting of ground  ${}^6H_{15/2}$  multiplet and angle ( $\Theta$ ) between the ground KD and excited KD at the CASSCF/RASSI<sup>3</sup> level.

| ${}^6H_{15/2}$ |                                       |       |       |        |                       |
|----------------|---------------------------------------|-------|-------|--------|-----------------------|
| KD             | $E$ [ $\text{cm}^{-1}$ ] <sup>a</sup> | $g_x$ | $g_y$ | $g_z$  | $\Theta$ [ $^\circ$ ] |
| 1              | 0.000                                 | 0.004 | 0.004 | 19.751 | -                     |
| 2              | 95.055                                | 0.155 | 0.164 | 17.501 | 20.210                |
| 3              | 148.454                               | 1.821 | 2.149 | 13.436 | 1.990                 |
| 4              | 185.565                               | 0.068 | 3.192 | 11.637 | 24.308                |
| 5              | 200.314                               | 0.683 | 5.182 | 11.663 | 59.077                |
| 6              | 238.384                               | 3.026 | 5.122 | 11.963 | 90.020                |
| 7              | 376.932                               | 0.939 | 2.604 | 14.100 | 90.348                |
| 8              | 407.491                               | 0.544 | 3.566 | 15.851 | 90.405                |
| ${}^6H_{13/2}$ |                                       |       |       |        |                       |
| KD             | $E$ [ $\text{cm}^{-1}$ ]              | $g_x$ | $g_y$ | $g_z$  | $\Theta$ [ $^\circ$ ] |
| 1              | 3573.054                              | -     | -     | -      | -                     |
| 2              | 3625.236                              | -     | -     | -      | -                     |
| 3              | 3691.232                              | -     | -     | -      | -                     |
| 4              | 3752.531                              | -     | -     | -      | -                     |
| 5              | 3797.634                              | -     | -     | -      | -                     |
| 6              | 3830.680                              | -     | -     | -      | -                     |
| 7              | 3849.368                              | -     | -     | -      | -                     |
| ${}^4F_{9/2}$  |                                       |       |       |        |                       |
| KD             | $E$ [ $\text{cm}^{-1}$ ]              | $g_x$ | $g_y$ | $g_z$  | $\Theta$ [ $^\circ$ ] |
| 1              | 24569.308                             | -     | -     | -      | -                     |
| 2              | 24635.951                             | -     | -     | -      | -                     |
| 3              | 24665.960                             | -     | -     | -      | -                     |
| 4              | 24727.506                             | -     | -     | -      | -                     |
| 5              | 24758.574                             | -     | -     | -      | -                     |

**Table S16.** Calculated energies ( $E$ ) for each KD arising from the crystal-field splitting of ground  ${}^6H_{15/2}$  and excited  ${}^6H_{13/2}$  and  ${}^4F_{9/2}$  multiplets of  $1T_e$  as well as the eigenvalues of  $g$ -tensors for each KD arising from the crystal-field splitting of ground  ${}^6H_{15/2}$  multiplet and angle ( $\Theta$ ) between the ground KD and excited KD at the CASSCF/RASSI<sup>3</sup> level.

| ${}^6H_{15/2}$ |                                       |       |       |        |                       |
|----------------|---------------------------------------|-------|-------|--------|-----------------------|
| KD             | $E$ [ $\text{cm}^{-1}$ ] <sup>a</sup> | $g_x$ | $g_y$ | $g_z$  | $\Theta$ [ $^\circ$ ] |
| 1              | 0.000                                 | 0.002 | 0.003 | 19.806 | -                     |
| 2              | 111.046                               | 0.048 | 0.054 | 17.360 | 15.267                |
| 3              | 183.950                               | 0.444 | 0.472 | 14.451 | 2.832                 |
| 4              | 234.374                               | 1.065 | 1.833 | 13.567 | 32.523                |
| 5              | 275.454                               | 2.730 | 5.584 | 8.713  | 42.537                |
| 6              | 337.959                               | 2.894 | 4.135 | 12.313 | 89.383                |
| 7              | 482.228                               | 0.608 | 0.876 | 15.056 | 90.080                |
| 8              | 532.045                               | 0.351 | 1.605 | 17.329 | 92.709                |
| ${}^6H_{13/2}$ |                                       |       |       |        |                       |
| KD             | $E$ [ $\text{cm}^{-1}$ ]              | $g_x$ | $g_y$ | $g_z$  | $\Theta$ [ $^\circ$ ] |
| 1              | 3582.386                              | -     | -     | -      | -                     |
| 2              | 3647.969                              | -     | -     | -      | -                     |
| 3              | 3740.148                              | -     | -     | -      | -                     |
| 4              | 3820.077                              | -     | -     | -      | -                     |
| 5              | 3876.499                              | -     | -     | -      | -                     |
| 6              | 3923.474                              | -     | -     | -      | -                     |
| 7              | 3970.047                              | -     | -     | -      | -                     |
| ${}^4F_{9/2}$  |                                       |       |       |        |                       |
| KD             | $E$ [ $\text{cm}^{-1}$ ]              | $g_x$ | $g_y$ | $g_z$  | $\Theta$ [ $^\circ$ ] |
| 1              | 24637.131                             | -     | -     | -      | -                     |
| 2              | 24699.535                             | -     | -     | -      | -                     |
| 3              | 24726.672                             | -     | -     | -      | -                     |
| 4              | 24777.329                             | -     | -     | -      | -                     |
| 5              | 24835.852                             | -     | -     | -      | -                     |

## Electronic Supporting Information

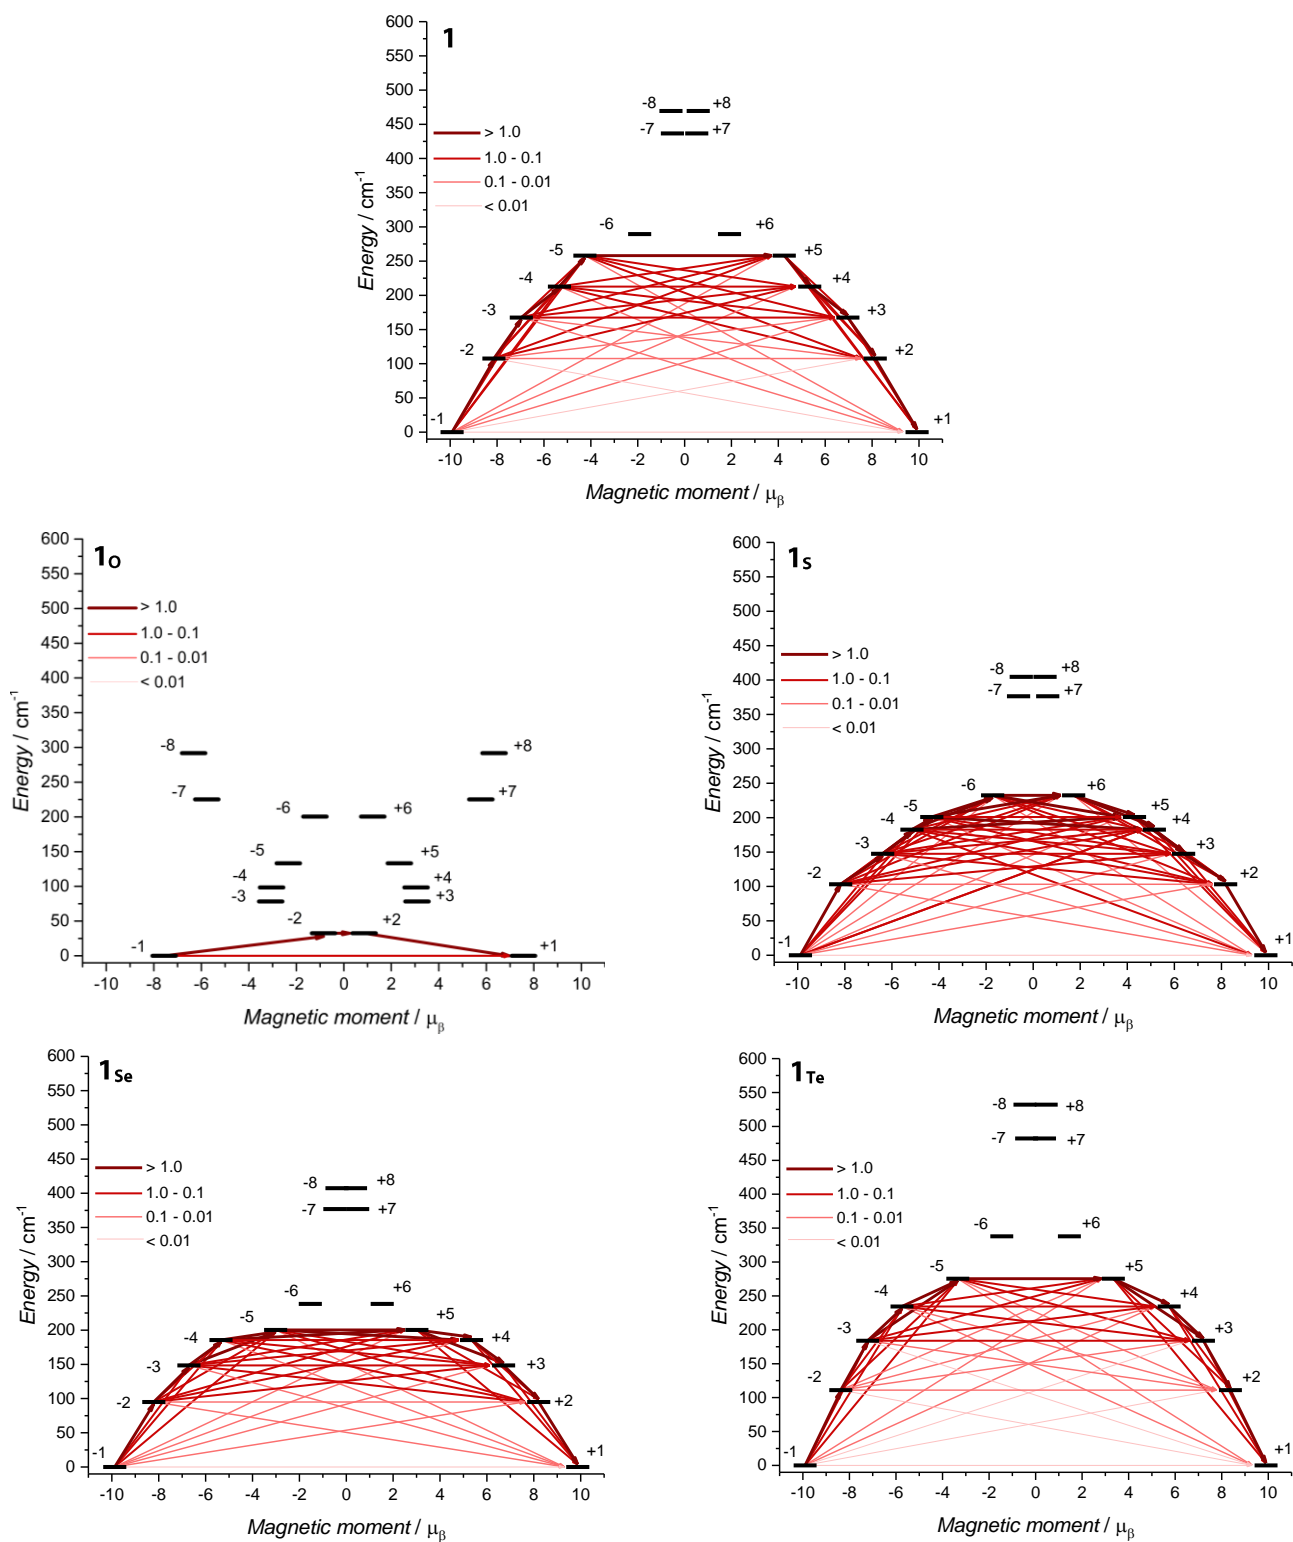

**Figure S8.** Calculated qualitative energy barriers for **1**, **1<sub>o</sub>**, **1<sub>s</sub>**, **1<sub>se</sub>**, and **1<sub>Te</sub>**. The values of transition magnetic moment matrix elements, that is, the transition probabilities between the different spin-orbit states, are presented with the different shades of red.

## Electronic Supporting Information

**Table S17.** Calculated crystal-field parameters  $B_{kq}$  ( $\text{cm}^{-1}$ ) presented in Iwahara-Chibotaru notation for **1**.

| <b>k</b> | <b>q</b> | <b>Re <math>B_{kq}</math> </b> | <b>Im <math>B_{kq}</math> </b> | <b> <math>B_{kq}</math> </b> |
|----------|----------|--------------------------------|--------------------------------|------------------------------|
| 2        | 0        | -244.2294                      | 0.0000                         | 244.2290                     |
| 2        | 1        | 10.2675                        | -9.1864                        | 13.7770                      |
| 2        | 2        | 6.0743                         | 9.9206                         | 11.6330                      |
| 4        | 0        | 25.3116                        | 0.0000                         | 25.3120                      |
| 4        | 1        | 11.2394                        | -5.0321                        | 12.3140                      |
| 4        | 2        | 4.3955                         | -1.0779                        | 4.5260                       |
| 4        | 3        | -1.6423                        | -21.3590                       | 21.4220                      |
| 4        | 4        | 31.8409                        | 39.1069                        | 50.4300                      |
| 6        | 0        | -22.7671                       | 0.0000                         | 22.7670                      |
| 6        | 1        | -13.2668                       | 7.7268                         | 15.3530                      |
| 6        | 2        | -4.7267                        | 5.5182                         | 7.2660                       |
| 6        | 3        | 1.8872                         | 4.4409                         | 4.8250                       |
| 6        | 4        | -6.0812                        | -7.6553                        | 9.7770                       |
| 6        | 5        | 0.0379                         | 0.2201                         | 0.2230                       |
| 6        | 6        | -3.6729                        | 1.1822                         | 3.8580                       |
| 8        | 0        | 0.2528                         | 0.0000                         | 0.2530                       |
| 8        | 1        | 0.2062                         | -0.1050                        | 0.2310                       |
| 8        | 2        | 0.0195                         | 0.0491                         | 0.0530                       |
| 8        | 3        | -0.0562                        | -0.2934                        | 0.2990                       |
| 8        | 4        | 0.1669                         | 0.1772                         | 0.2430                       |
| 8        | 5        | -0.0444                        | -0.0200                        | 0.0490                       |
| 8        | 6        | 0.0324                         | -0.0112                        | 0.0340                       |
| 8        | 7        | -0.0037                        | -0.0011                        | 0.0040                       |
| 8        | 8        | -0.0054                        | 0.0225                         | 0.0230                       |
| 10       | 0        | 0.0195                         | 0.0000                         | 0.0200                       |
| 10       | 1        | -0.0198                        | 0.0184                         | 0.0270                       |
| 10       | 2        | -0.0035                        | -0.0091                        | 0.0100                       |
| 10       | 3        | 0.0074                         | 0.0379                         | 0.0390                       |
| 10       | 4        | -0.0146                        | -0.0117                        | 0.0190                       |
| 10       | 5        | 0.0166                         | 0.0066                         | 0.0180                       |
| 10       | 6        | 0.0019                         | -0.0017                        | 0.0020                       |
| 10       | 7        | -0.0033                        | 0.0040                         | 0.0050                       |
| 10       | 8        | 0.0025                         | -0.0100                        | 0.0100                       |
| 10       | 9        | 0.0000                         | 0.0012                         | 0.0010                       |
| 10       | 10       | -0.0050                        | -0.0033                        | 0.0060                       |
| 12       | 0        | -0.0019                        | 0.0000                         | 0.0020                       |
| 12       | 1        | 0.0011                         | -0.0013                        | 0.0020                       |
| 12       | 2        | 0.0008                         | -0.0003                        | 0.0010                       |
| 12       | 3        | -0.0004                        | -0.0021                        | 0.0020                       |
| 12       | 4        | 0.0008                         | 0.0006                         | 0.0010                       |
| 12       | 5        | -0.0007                        | -0.0003                        | 0.0010                       |
| 12       | 6        | 0.0001                         | 0.0000                         | 0.0000                       |
| 12       | 7        | 0.0000                         | 0.0000                         | 0.0000                       |
| 12       | 8        | -0.0001                        | 0.0003                         | 0.0000                       |
| 12       | 9        | 0.0000                         | 0.0000                         | 0.0000                       |
| 12       | 10       | 0.0001                         | 0.0001                         | 0.0000                       |
| 12       | 11       | 0.0000                         | 0.0000                         | 0.0000                       |
| 12       | 12       | 0.0001                         | 0.0000                         | 0.0000                       |

Electronic Supporting Information

---

|    |    |        |        |        |
|----|----|--------|--------|--------|
| 14 | 0  | 0.0000 | 0.0000 | 0.0000 |
| 14 | 1  | 0.0000 | 0.0000 | 0.0000 |
| 14 | 2  | 0.0000 | 0.0000 | 0.0000 |
| 14 | 3  | 0.0000 | 0.0000 | 0.0000 |
| 14 | 4  | 0.0000 | 0.0000 | 0.0000 |
| 14 | 5  | 0.0000 | 0.0000 | 0.0000 |
| 14 | 6  | 0.0000 | 0.0000 | 0.0000 |
| 14 | 7  | 0.0000 | 0.0000 | 0.0000 |
| 14 | 8  | 0.0000 | 0.0000 | 0.0000 |
| 14 | 9  | 0.0000 | 0.0000 | 0.0000 |
| 14 | 10 | 0.0000 | 0.0000 | 0.0000 |
| 14 | 11 | 0.0000 | 0.0000 | 0.0000 |
| 14 | 12 | 0.0000 | 0.0000 | 0.0000 |
| 14 | 13 | 0.0000 | 0.0000 | 0.0000 |
| 14 | 14 | 0.0000 | 0.0000 | 0.0000 |

---



## Electronic Supporting Information

**Table S18.** Calculated crystal-field parameters  $B_{kq}$  ( $\text{cm}^{-1}$ ) presented in Iwahara-Chibotaru notation for  $1\text{o}$ .

| <b>k</b> | <b>q</b> | <b>Re <math>B_{kq}</math> </b> | <b>Im <math>B_{kq}</math> </b> | <b> <math>B_{kq}</math> </b> |
|----------|----------|--------------------------------|--------------------------------|------------------------------|
| 2        | 0        | -13.8411                       | 0.0000                         | 13.8410                      |
| 2        | 1        | -24.6044                       | 3.2267                         | 24.8150                      |
| 2        | 2        | 49.1785                        | 6.4227                         | 49.5960                      |
| 4        | 0        | -67.1629                       | 0.0000                         | 67.1630                      |
| 4        | 1        | 12.5641                        | -3.5619                        | 13.0590                      |
| 4        | 2        | 50.7856                        | -23.9279                       | 56.1400                      |
| 4        | 3        | -3.1414                        | 2.0633                         | 3.7580                       |
| 4        | 4        | -16.8012                       | -9.5501                        | 19.3260                      |
| 6        | 0        | 1.3563                         | 0.0000                         | 1.3560                       |
| 6        | 1        | 2.6096                         | 1.8857                         | 3.2200                       |
| 6        | 2        | 15.2785                        | 7.0566                         | 16.8290                      |
| 6        | 3        | -1.7395                        | 1.9004                         | 2.5760                       |
| 6        | 4        | 14.0443                        | 1.8824                         | 14.1700                      |
| 6        | 5        | 1.7906                         | 0.8785                         | 1.9940                       |
| 6        | 6        | 15.6348                        | -14.8882                       | 21.5890                      |
| 8        | 0        | 0.1532                         | 0.0000                         | 0.1530                       |
| 8        | 1        | -0.0572                        | 0.0115                         | 0.0580                       |
| 8        | 2        | -0.2145                        | -0.0368                        | 0.2180                       |
| 8        | 3        | 0.0263                         | 0.0044                         | 0.0270                       |
| 8        | 4        | 0.0060                         | 0.0337                         | 0.0340                       |
| 8        | 5        | 0.0562                         | -0.0072                        | 0.0570                       |
| 8        | 6        | 0.1764                         | -0.0711                        | 0.1900                       |
| 8        | 7        | -0.0035                        | 0.0041                         | 0.0050                       |
| 8        | 8        | -0.0080                        | 0.0304                         | 0.0310                       |
| 10       | 0        | 0.0372                         | 0.0000                         | 0.0370                       |
| 10       | 1        | -0.0202                        | -0.0006                        | 0.0200                       |
| 10       | 2        | -0.0190                        | -0.0119                        | 0.0220                       |
| 10       | 3        | 0.0055                         | -0.0051                        | 0.0070                       |
| 10       | 4        | 0.0017                         | -0.0141                        | 0.0140                       |
| 10       | 5        | -0.0026                        | 0.0056                         | 0.0060                       |
| 10       | 6        | 0.0073                         | 0.0007                         | 0.0070                       |
| 10       | 7        | 0.0041                         | 0.0008                         | 0.0040                       |
| 10       | 8        | 0.0093                         | -0.0192                        | 0.0210                       |
| 10       | 9        | -0.0015                        | 0.0023                         | 0.0030                       |
| 10       | 10       | -0.0097                        | 0.0000                         | 0.0100                       |
| 12       | 0        | 0.0028                         | 0.0000                         | 0.0030                       |
| 12       | 1        | -0.0007                        | 0.0006                         | 0.0010                       |
| 12       | 2        | 0.0013                         | -0.0001                        | 0.0010                       |
| 12       | 3        | -0.0001                        | 0.0003                         | 0.0000                       |
| 12       | 4        | 0.0006                         | 0.0002                         | 0.0010                       |
| 12       | 5        | -0.0003                        | 0.0002                         | 0.0000                       |
| 12       | 6        | 0.0005                         | 0.0004                         | 0.0010                       |
| 12       | 7        | -0.0003                        | 0.0001                         | 0.0000                       |
| 12       | 8        | 0.0003                         | 0.0002                         | 0.0000                       |
| 12       | 9        | 0.0001                         | 0.0001                         | 0.0000                       |
| 12       | 10       | 0.0006                         | -0.0005                        | 0.0010                       |
| 12       | 11       | 0.0002                         | -0.0001                        | 0.0000                       |
| 12       | 12       | 0.0001                         | -0.0017                        | 0.0020                       |

Electronic Supporting Information

---

|    |    |        |        |        |
|----|----|--------|--------|--------|
| 14 | 0  | 0.0000 | 0.0000 | 0.0000 |
| 14 | 1  | 0.0000 | 0.0000 | 0.0000 |
| 14 | 2  | 0.0000 | 0.0000 | 0.0000 |
| 14 | 3  | 0.0000 | 0.0000 | 0.0000 |
| 14 | 4  | 0.0000 | 0.0000 | 0.0000 |
| 14 | 5  | 0.0000 | 0.0000 | 0.0000 |
| 14 | 6  | 0.0000 | 0.0000 | 0.0000 |
| 14 | 7  | 0.0000 | 0.0000 | 0.0000 |
| 14 | 8  | 0.0000 | 0.0000 | 0.0000 |
| 14 | 9  | 0.0000 | 0.0000 | 0.0000 |
| 14 | 10 | 0.0000 | 0.0000 | 0.0000 |
| 14 | 11 | 0.0000 | 0.0000 | 0.0000 |
| 14 | 12 | 0.0000 | 0.0000 | 0.0000 |
| 14 | 13 | 0.0000 | 0.0000 | 0.0000 |
| 14 | 14 | 0.0000 | 0.0000 | 0.0000 |

---

## Electronic Supporting Information

**Table S19.** Calculated crystal-field parameters  $B_{kq}$  ( $\text{cm}^{-1}$ ) presented in Iwahara-Chibotaru notation for  $1s$ .

| <b>k</b> | <b>q</b> | <b>Re <math>B_{kq}</math> </b> | <b>Im <math>B_{kq}</math> </b> | <b> <math>B_{kq}</math> </b> |
|----------|----------|--------------------------------|--------------------------------|------------------------------|
| 2        | 0        | -199.3401                      | 0.0000                         | 199.3400                     |
| 2        | 1        | 3.0213                         | -0.8594                        | 3.1410                       |
| 2        | 2        | 0.6791                         | 21.6321                        | 21.6430                      |
| 4        | 0        | 17.1286                        | 0.0000                         | 17.1290                      |
| 4        | 1        | -13.4127                       | 16.8845                        | 21.5640                      |
| 4        | 2        | 2.0854                         | -10.5261                       | 10.7310                      |
| 4        | 3        | 8.7988                         | 18.8222                        | 20.7770                      |
| 4        | 4        | 40.8010                        | 14.5626                        | 43.3220                      |
| 6        | 0        | -21.7406                       | 0.0000                         | 21.7410                      |
| 6        | 1        | 8.5657                         | -11.1041                       | 14.0240                      |
| 6        | 2        | -0.4965                        | 5.4333                         | 5.4560                       |
| 6        | 3        | 1.1725                         | 1.4743                         | 1.8840                       |
| 6        | 4        | -11.1736                       | -3.0457                        | 11.5810                      |
| 6        | 5        | 2.8329                         | -2.7191                        | 3.9270                       |
| 6        | 6        | -3.1314                        | 6.1781                         | 6.9260                       |
| 8        | 0        | 0.1763                         | 0.0000                         | 0.1760                       |
| 8        | 1        | -0.0588                        | 0.0983                         | 0.1150                       |
| 8        | 2        | -0.0475                        | 0.0408                         | 0.0630                       |
| 8        | 3        | 0.0590                         | 0.1959                         | 0.2050                       |
| 8        | 4        | 0.2025                         | 0.0401                         | 0.2060                       |
| 8        | 5        | 0.0405                         | -0.0033                        | 0.0410                       |
| 8        | 6        | 0.0093                         | -0.0353                        | 0.0360                       |
| 8        | 7        | -0.0057                        | -0.0192                        | 0.0200                       |
| 8        | 8        | 0.0209                         | 0.0145                         | 0.0250                       |
| 10       | 0        | 0.0322                         | 0.0000                         | 0.0320                       |
| 10       | 1        | 0.0054                         | -0.0198                        | 0.0210                       |
| 10       | 2        | 0.0077                         | 0.0058                         | 0.0100                       |
| 10       | 3        | -0.0142                        | -0.0308                        | 0.0340                       |
| 10       | 4        | -0.0132                        | -0.0001                        | 0.0130                       |
| 10       | 5        | -0.0122                        | 0.0072                         | 0.0140                       |
| 10       | 6        | -0.0006                        | -0.0006                        | 0.0010                       |
| 10       | 7        | 0.0009                         | -0.0010                        | 0.0010                       |
| 10       | 8        | -0.0068                        | -0.0052                        | 0.0090                       |
| 10       | 9        | 0.0016                         | -0.0022                        | 0.0030                       |
| 10       | 10       | -0.0064                        | 0.0060                         | 0.0090                       |
| 12       | 0        | -0.0016                        | 0.0000                         | 0.0020                       |
| 12       | 1        | -0.0003                        | 0.0013                         | 0.0010                       |
| 12       | 2        | -0.0001                        | -0.0014                        | 0.0010                       |
| 12       | 3        | 0.0005                         | 0.0012                         | 0.0010                       |
| 12       | 4        | 0.0007                         | 0.0000                         | 0.0010                       |
| 12       | 5        | 0.0005                         | -0.0002                        | 0.0010                       |
| 12       | 6        | 0.0001                         | 0.0000                         | 0.0000                       |
| 12       | 7        | -0.0001                        | -0.0003                        | 0.0000                       |
| 12       | 8        | 0.0003                         | 0.0002                         | 0.0000                       |
| 12       | 9        | -0.0002                        | 0.0001                         | 0.0000                       |
| 12       | 10       | 0.0001                         | -0.0002                        | 0.0000                       |
| 12       | 11       | 0.0000                         | 0.0001                         | 0.0000                       |
| 12       | 12       | -0.0001                        | -0.0001                        | 0.0000                       |

Electronic Supporting Information

---

|    |    |        |        |        |
|----|----|--------|--------|--------|
| 14 | 0  | 0.0000 | 0.0000 | 0.0000 |
| 14 | 1  | 0.0000 | 0.0000 | 0.0000 |
| 14 | 2  | 0.0000 | 0.0000 | 0.0000 |
| 14 | 3  | 0.0000 | 0.0000 | 0.0000 |
| 14 | 4  | 0.0000 | 0.0000 | 0.0000 |
| 14 | 5  | 0.0000 | 0.0000 | 0.0000 |
| 14 | 6  | 0.0000 | 0.0000 | 0.0000 |
| 14 | 7  | 0.0000 | 0.0000 | 0.0000 |
| 14 | 8  | 0.0000 | 0.0000 | 0.0000 |
| 14 | 9  | 0.0000 | 0.0000 | 0.0000 |
| 14 | 10 | 0.0000 | 0.0000 | 0.0000 |
| 14 | 11 | 0.0000 | 0.0000 | 0.0000 |
| 14 | 12 | 0.0000 | 0.0000 | 0.0000 |
| 14 | 13 | 0.0000 | 0.0000 | 0.0000 |
| 14 | 14 | 0.0000 | 0.0000 | 0.0000 |

---

## Electronic Supporting Information

**Table S20.** Calculated crystal-field parameters  $B_{kq}$  ( $\text{cm}^{-1}$ ) presented in Iwahara-Chibotaru notation for  $1s_e$ .

| <b>k</b> | <b>q</b> | <b>Re <math>B_{kq}</math> </b> | <b>Im <math>B_{kq}</math> </b> | <b> <math>B_{kq}</math> </b> |
|----------|----------|--------------------------------|--------------------------------|------------------------------|
| 2        | 0        | -204.4090                      | 0.0000                         | 204.4090                     |
| 2        | 1        | 0.9371                         | 0.6004                         | 1.1130                       |
| 2        | 2        | -28.1790                       | -16.1403                       | 32.4740                      |
| 4        | 0        | 18.5831                        | 0.0000                         | 18.5830                      |
| 4        | 1        | -17.9756                       | -5.1097                        | 18.6880                      |
| 4        | 2        | 8.5507                         | 3.9219                         | 9.4070                       |
| 4        | 3        | -14.5309                       | -14.2678                       | 20.3650                      |
| 4        | 4        | -20.0704                       | -33.5352                       | 39.0820                      |
| 6        | 0        | -18.1855                       | 0.0000                         | 18.1860                      |
| 6        | 1        | 13.2784                        | 3.5883                         | 13.7550                      |
| 6        | 2        | -5.8059                        | -3.1893                        | 6.6240                       |
| 6        | 3        | -0.5088                        | -0.3935                        | 0.6430                       |
| 6        | 4        | 6.1673                         | 10.3206                        | 12.0230                      |
| 6        | 5        | -0.7641                        | -2.8546                        | 2.9550                       |
| 6        | 6        | 0.2083                         | 6.5200                         | 6.5230                       |
| 8        | 0        | 0.1765                         | 0.0000                         | 0.1770                       |
| 8        | 1        | -0.1108                        | -0.0343                        | 0.1160                       |
| 8        | 2        | -0.0343                        | -0.0176                        | 0.0390                       |
| 8        | 3        | -0.1210                        | -0.1207                        | 0.1710                       |
| 8        | 4        | -0.0903                        | -0.1745                        | 0.1960                       |
| 8        | 5        | -0.0103                        | -0.0288                        | 0.0310                       |
| 8        | 6        | 0.0018                         | -0.0399                        | 0.0400                       |
| 8        | 7        | 0.0041                         | -0.0174                        | 0.0180                       |
| 8        | 8        | -0.0094                        | 0.0169                         | 0.0190                       |
| 10       | 0        | 0.0285                         | 0.0000                         | 0.0280                       |
| 10       | 1        | 0.0127                         | 0.0058                         | 0.0140                       |
| 10       | 2        | -0.0012                        | -0.0011                        | 0.0020                       |
| 10       | 3        | 0.0218                         | 0.0222                         | 0.0310                       |
| 10       | 4        | 0.0038                         | 0.0107                         | 0.0110                       |
| 10       | 5        | 0.0039                         | 0.0128                         | 0.0130                       |
| 10       | 6        | 0.0001                         | -0.0002                        | 0.0000                       |
| 10       | 7        | 0.0004                         | -0.0017                        | 0.0020                       |
| 10       | 8        | 0.0042                         | -0.0080                        | 0.0090                       |
| 10       | 9        | -0.0007                        | 0.0006                         | 0.0010                       |
| 10       | 10       | 0.0060                         | -0.0039                        | 0.0070                       |
| 12       | 0        | -0.0016                        | 0.0000                         | 0.0020                       |
| 12       | 1        | -0.0005                        | -0.0003                        | 0.0010                       |
| 12       | 2        | 0.0009                         | 0.0006                         | 0.0010                       |
| 12       | 3        | -0.0011                        | -0.0011                        | 0.0020                       |
| 12       | 4        | -0.0002                        | -0.0006                        | 0.0010                       |
| 12       | 5        | -0.0002                        | -0.0006                        | 0.0010                       |
| 12       | 6        | 0.0000                         | -0.0001                        | 0.0000                       |
| 12       | 7        | 0.0001                         | -0.0003                        | 0.0000                       |
| 12       | 8        | -0.0002                        | 0.0003                         | 0.0000                       |
| 12       | 9        | 0.0001                         | -0.0001                        | 0.0000                       |
| 12       | 10       | -0.0002                        | 0.0001                         | 0.0000                       |

Electronic Supporting Information

---

|    |    |         |        |        |
|----|----|---------|--------|--------|
| 12 | 11 | 0.0001  | 0.0000 | 0.0000 |
| 12 | 12 | -0.0001 | 0.0000 | 0.0000 |
| 14 | 0  | 0.0000  | 0.0000 | 0.0000 |
| 14 | 1  | 0.0000  | 0.0000 | 0.0000 |
| 14 | 2  | 0.0000  | 0.0000 | 0.0000 |
| 14 | 3  | 0.0000  | 0.0000 | 0.0000 |
| 14 | 4  | 0.0000  | 0.0000 | 0.0000 |
| 14 | 5  | 0.0000  | 0.0000 | 0.0000 |
| 14 | 6  | 0.0000  | 0.0000 | 0.0000 |
| 14 | 7  | 0.0000  | 0.0000 | 0.0000 |
| 14 | 8  | 0.0000  | 0.0000 | 0.0000 |
| 14 | 9  | 0.0000  | 0.0000 | 0.0000 |
| 14 | 10 | 0.0000  | 0.0000 | 0.0000 |
| 14 | 11 | 0.0000  | 0.0000 | 0.0000 |
| 14 | 12 | 0.0000  | 0.0000 | 0.0000 |
| 14 | 13 | 0.0000  | 0.0000 | 0.0000 |
| 14 | 14 | 0.0000  | 0.0000 | 0.0000 |

---

**Table S21.** Calculated crystal-field parameters  $B_{kq}$  ( $\text{cm}^{-1}$ ) presented in Iwahara-Chibotaru notation for  $1T_e$ .

| <b>k</b> | <b>q</b> | <b>Re <math>B_{kq}</math> </b> | <b>Im <math>B_{kq}</math> </b> | <b> <math>B_{kq}</math> </b> |
|----------|----------|--------------------------------|--------------------------------|------------------------------|
| 2        | 0        | -281.8421                      | 0.0000                         | 281.8420                     |
| 2        | 1        | -3.2354                        | 2.5738                         | 4.1340                       |
| 2        | 2        | 48.5376                        | -21.1207                       | 52.9340                      |
| 4        | 0        | 32.3338                        | 0.0000                         | 32.3340                      |
| 4        | 1        | 2.9269                         | -18.6850                       | 18.9130                      |
| 4        | 2        | -8.0610                        | 9.0493                         | 12.1190                      |
| 4        | 3        | 11.8471                        | 13.9130                        | 18.2740                      |
| 4        | 4        | -20.7833                       | 26.8215                        | 33.9310                      |
| 6        | 0        | -18.1336                       | 0.0000                         | 18.1340                      |
| 6        | 1        | -0.3379                        | 12.7328                        | 12.7370                      |
| 6        | 2        | 4.6570                         | -2.4129                        | 5.2450                       |
| 6        | 3        | 0.1572                         | 0.1467                         | 0.2150                       |
| 6        | 4        | 9.5454                         | -10.3921                       | 14.1110                      |
| 6        | 5        | -1.1912                        | -2.7990                        | 3.0420                       |
| 6        | 6        | -1.1289                        | 5.8808                         | 5.9880                       |
| 8        | 0        | 0.2103                         | 0.0000                         | 0.2100                       |
| 8        | 1        | 0.0636                         | -0.1454                        | 0.1590                       |
| 8        | 2        | 0.0063                         | -0.0093                        | 0.0110                       |
| 8        | 3        | 0.1341                         | 0.0703                         | 0.1510                       |
| 8        | 4        | -0.1868                        | 0.1936                         | 0.2690                       |
| 8        | 5        | -0.0258                        | 0.0162                         | 0.0310                       |
| 8        | 6        | 0.0180                         | -0.0472                        | 0.0510                       |
| 8        | 7        | 0.0183                         | 0.0004                         | 0.0180                       |
| 8        | 8        | 0.0013                         | -0.0100                        | 0.0100                       |
| 10       | 0        | 0.0200                         | 0.0000                         | 0.0200                       |
| 10       | 1        | -0.0141                        | 0.0230                         | 0.0270                       |
| 10       | 2        | 0.0048                         | 0.0012                         | 0.0050                       |
| 10       | 3        | -0.0209                        | -0.0189                        | 0.0280                       |
| 10       | 4        | 0.0118                         | -0.0091                        | 0.0150                       |
| 10       | 5        | 0.0094                         | 0.0064                         | 0.0110                       |
| 10       | 6        | 0.0018                         | 0.0024                         | 0.0030                       |
| 10       | 7        | 0.0031                         | -0.0003                        | 0.0030                       |
| 10       | 8        | 0.0022                         | 0.0094                         | 0.0100                       |
| 10       | 9        | 0.0013                         | 0.0019                         | 0.0020                       |
| 10       | 10       | -0.0034                        | -0.0037                        | 0.0050                       |
| 12       | 0        | -0.0014                        | 0.0000                         | 0.0010                       |
| 12       | 1        | 0.0007                         | -0.0010                        | 0.0010                       |
| 12       | 2        | -0.0008                        | 0.0002                         | 0.0010                       |
| 12       | 3        | 0.0013                         | 0.0011                         | 0.0020                       |
| 12       | 4        | -0.0006                        | 0.0006                         | 0.0010                       |
| 12       | 5        | -0.0006                        | -0.0003                        | 0.0010                       |
| 12       | 6        | -0.0001                        | -0.0002                        | 0.0000                       |
| 12       | 7        | 0.0002                         | 0.0000                         | 0.0000                       |
| 12       | 8        | -0.0001                        | -0.0005                        | 0.0000                       |
| 12       | 9        | -0.0002                        | -0.0001                        | 0.0000                       |
| 12       | 10       | 0.0001                         | 0.0002                         | 0.0000                       |
| 12       | 11       | 0.0001                         | 0.0000                         | 0.0000                       |
| 12       | 12       | -0.0001                        | 0.0000                         | 0.0000                       |
| 14       | 0        | 0.0000                         | 0.0000                         | 0.0000                       |

## Electronic Supporting Information

|    |    |        |        |        |
|----|----|--------|--------|--------|
| 14 | 1  | 0.0000 | 0.0000 | 0.0000 |
| 14 | 2  | 0.0000 | 0.0000 | 0.0000 |
| 14 | 3  | 0.0000 | 0.0000 | 0.0000 |
| 14 | 4  | 0.0000 | 0.0000 | 0.0000 |
| 14 | 5  | 0.0000 | 0.0000 | 0.0000 |
| 14 | 6  | 0.0000 | 0.0000 | 0.0000 |
| 14 | 7  | 0.0000 | 0.0000 | 0.0000 |
| 14 | 8  | 0.0000 | 0.0000 | 0.0000 |
| 14 | 9  | 0.0000 | 0.0000 | 0.0000 |
| 14 | 10 | 0.0000 | 0.0000 | 0.0000 |
| 14 | 11 | 0.0000 | 0.0000 | 0.0000 |
| 14 | 12 | 0.0000 | 0.0000 | 0.0000 |
| 14 | 13 | 0.0000 | 0.0000 | 0.0000 |
| 14 | 14 | 0.0000 | 0.0000 | 0.0000 |

**Table S22.** Calculated LoProp and AIM charges for the selected atoms of **1**, **1<sub>O</sub>**, **1<sub>S</sub>**, **1<sub>Se</sub>**, and **1<sub>Te</sub>**.

|             | <b>1</b>      |            | <b>1<sub>O</sub></b> |            | <b>1<sub>S</sub></b> |            | <b>1<sub>Se</sub></b> |            | <b>1<sub>Te</sub></b> |            |
|-------------|---------------|------------|----------------------|------------|----------------------|------------|-----------------------|------------|-----------------------|------------|
| <b>Atom</b> | <b>LoProp</b> | <b>AIM</b> | <b>LoProp</b>        | <b>AIM</b> | <b>LoProp</b>        | <b>AIM</b> | <b>LoProp</b>         | <b>AIM</b> | <b>LoProp</b>         | <b>AIM</b> |
| <b>N57</b>  | -0.39         | -1.21      | -0.37                | -0.39      | -1.21                | -0.37      | -0.39                 | -1.21      | -0.37                 | -0.39      |
| <b>N58</b>  | -0.38         | -1.21      | -0.36                | -0.38      | -1.21                | -0.36      | -0.38                 | -1.21      | -0.36                 | -0.38      |
| <b>O59</b>  | -0.69         | -1.23      | -0.76                | -0.69      | -1.23                | -0.76      | -0.69                 | -1.23      | -0.76                 | -0.69      |
| <b>O60</b>  | -0.73         | -1.24      | -0.78                | -0.73      | -1.24                | -0.78      | -0.73                 | -1.24      | -0.78                 | -0.73      |
| <b>O61</b>  | -0.70         | -1.22      | -0.76                | -0.70      | -1.22                | -0.76      | -0.70                 | -1.22      | -0.76                 | -0.70      |
| <b>E62</b>  | -0.54         | -0.29      | -0.76                | -0.54      | -0.29                | -0.76      | -0.54                 | -0.29      | -0.76                 | -0.54      |
| <b>E63</b>  | -0.50         | -0.22      | -0.74                | -0.50      | -0.22                | -0.74      | -0.50                 | -0.22      | -0.74                 | -0.50      |
| <b>E64</b>  | -0.53         | -0.27      | -0.76                | -0.53      | -0.27                | -0.76      | -0.53                 | -0.27      | -0.76                 | -0.53      |
| <b>Dy65</b> | 2.38          | 2.13       | 2.49                 | 2.38       | 2.13                 | 2.49       | 2.38                  | 2.13       | 2.49                  | 2.38       |



## Electronic Supporting Information

**Table S23.** Calculated densities ( $\rho(r)$ ), Laplacians ( $\nabla^2\rho(r)$ ) and delocalization indices ( $DI$ ) for the selected bond critical points (BCP) of **1**, **1<sub>o</sub>**, **1<sub>s</sub>**, **1<sub>se</sub>**, and **1<sub>Te</sub>**.

| BCP             | <b>1</b>  |                   |       | <b>1<sub>o</sub></b> |                   |       | <b>1<sub>s</sub></b> |                   |       | <b>1<sub>se</sub></b> |                   |       | <b>1<sub>Te</sub></b> |                   |       |
|-----------------|-----------|-------------------|-------|----------------------|-------------------|-------|----------------------|-------------------|-------|-----------------------|-------------------|-------|-----------------------|-------------------|-------|
|                 | $\rho(r)$ | $\nabla^2\rho(r)$ | $DI$  | $\rho(r)$            | $\nabla^2\rho(r)$ | $DI$  | $\rho(r)$            | $\nabla^2\rho(r)$ | $DI$  | $\rho(r)$             | $\nabla^2\rho(r)$ | $DI$  | $\rho(r)$             | $\nabla^2\rho(r)$ | $DI$  |
| <b>Dy65-N57</b> | 0.049     | 0.040             | 0.236 | 0.042                | 0.135             | 0.202 | 0.044                | 0.138             | 0.217 | 0.045                 | 0.140             | 0.226 | 0.045                 | 0.138             | 0.229 |
| <b>Dy65-N58</b> | 0.043     | 0.144             | 0.221 | 0.041                | 0.134             | 0.207 | 0.041                | 0.134             | 0.214 | 0.040                 | 0.131             | 0.214 | 0.041                 | 0.132             | 0.222 |
| <b>Dy65-O59</b> | 0.059     | 0.217             | 0.277 | 0.054                | 0.201             | 0.265 | 0.053                | 0.199             | 0.258 | 0.051                 | 0.189             | 0.251 | 0.053                 | 0.200             | 0.259 |
| <b>Dy65-O60</b> | 0.059     | 0.218             | 0.287 | 0.054                | 0.197             | 0.265 | 0.057                | 0.208             | 0.278 | 0.055                 | 0.201             | 0.271 | 0.055                 | 0.204             | 0.278 |
| <b>Dy65-O61</b> | 0.055     | 0.207             | 0.264 | 0.054                | 0.197             | 0.265 | 0.054                | 0.199             | 0.263 | 0.051                 | 0.192             | 0.249 | 0.053                 | 0.195             | 0.257 |
| <b>Dy65-E62</b> | 0.042     | 0.088             | 0.298 | 0.053                | 0.192             | 0.261 | 0.039                | 0.080             | 0.287 | 0.036                 | 0.061             | 0.305 | 0.029                 | 0.039             | 0.301 |
| <b>Dy65-E63</b> | 0.039     | 0.082             | 0.275 | 0.056                | 0.204             | 0.278 | 0.041                | 0.085             | 0.300 | 0.037                 | 0.063             | 0.313 | 0.031                 | 0.041             | 0.314 |
| <b>Dy65-E64</b> | 0.040     | 0.086             | 0.293 | 0.053                | 0.194             | 0.263 | 0.038                | 0.080             | 0.286 | 0.036                 | 0.061             | 0.307 | 0.030                 | 0.039             | 0.309 |

## Electronic Supporting Information

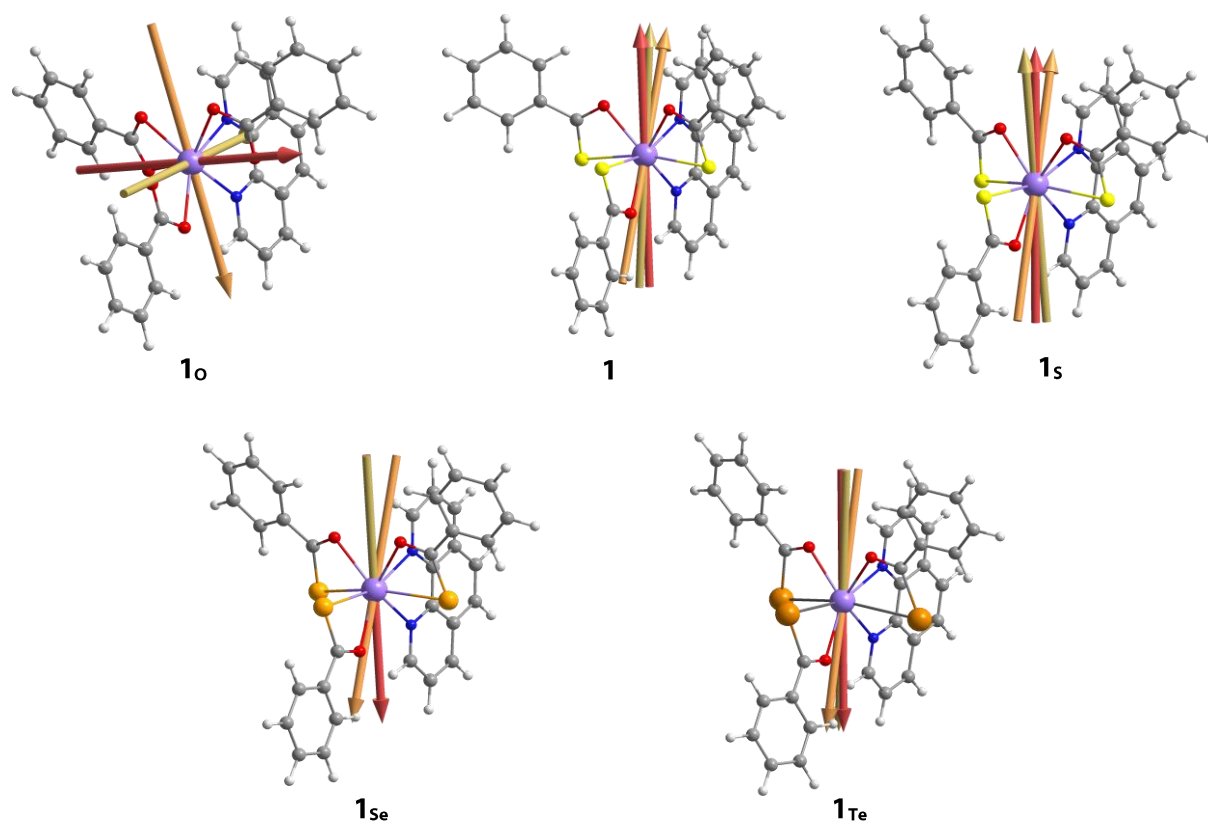

**Figure S9.** Main magnetic axes for the three first KD of the ground multiplet  ${}^6H_{15/2}$  of  $Dy^{3+}$  ion in **1**, **1<sub>o</sub>**, **1<sub>s</sub>**, **1<sub>se</sub>**, and **1<sub>Te</sub>**. Color coding for axes: red = the ground KD, orange = the first excited KD, yellow = the second excited KD.

**Table S24.** Excitation energies ( $cm^{-1}$ ) for the first singlet ( $S^*$ ) and triplet ( $T^*$ ) excited states of  $tba_o^-$ ,  $tba_s^-$ ,  $tba_{se}^-$ ,  $tba_{Te}^-$ , and phen calculated at the CAM-B3LYP and LC- $\omega$ PBE exchange-correlation functionals in conjunction with different basis sets.

|                     | CAM-B3LYP        |           |           |           |           |
|---------------------|------------------|-----------|-----------|-----------|-----------|
|                     | $ba^-$           | $tba^-$   | $seba^-$  | $teba^-$  | phen      |
| $S^*$ (TZVP)        | -                | 24805.572 | -         | -         | -         |
| $T^*$ (TZVP)        | -                | 22808.544 | -         | -         | -         |
| $S^*$ def2-TZVPP    | 35380.303        | 25053.990 | 22627.069 | 20117.879 | 35484.348 |
| $T^*$ def2-TZVPP    | 28941.581        | 22923.075 | 20907.496 | 18768.514 | 22388.329 |
| $S^*$ (def2-QZVPPD) | 35539.194        | 24933.814 | 22538.348 | 19949.309 | 35386.755 |
| $T^*$ (def2-QZVPPD) | 28844.795        | 23059.382 | 21012.348 | 18709.636 | 22361.713 |
|                     | LC- $\omega$ PBE |           |           |           |           |
|                     | $ba_o^-$         | $tba^-$   | $seba^-$  | $teba^-$  | phen      |
| $S^*$ (TZVP)        | -                | 28606.861 | -         | -         | -         |
| $T^*$ (TZVP)        | -                | 24151.456 | -         | -         | -         |
| $S^*$ def2-TZVPP    | 38942.852        | 28705.261 | 26590.476 | 24358.741 | 37517.671 |
| $T^*$ def2-TZVPP    | 25587.929        | 24015.149 | 22810.157 | 21661.624 | 19254.866 |
| $S^*$ (def2-QZVPPD) | 38999.311        | 28351.990 | 26323.507 | 24088.545 | 37432.983 |
| $T^*$ (def2-QZVPPD) | 25481.464        | 23938.526 | 22725.469 | 21436.595 | 19200.021 |

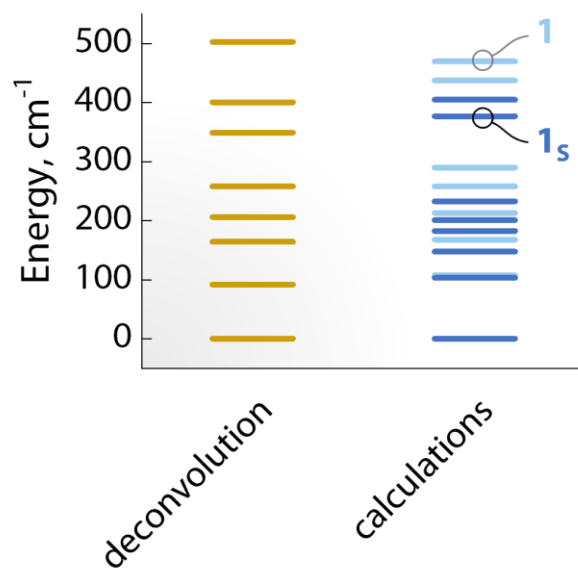

**Figure S10.** Comparison of the  $m_j$  levels (KDs) of the ground  ${}^6\text{H}_{15/2}$  multiplet of  $\text{Dy}^{3+}$  as obtained from the deconvolution of the  ${}^4\text{F}_{5/2} \rightarrow {}^6\text{H}_{15/2}$  transition (yellow) and those calculated (light blue – **1**; dark blue – **1<sub>s</sub>**).

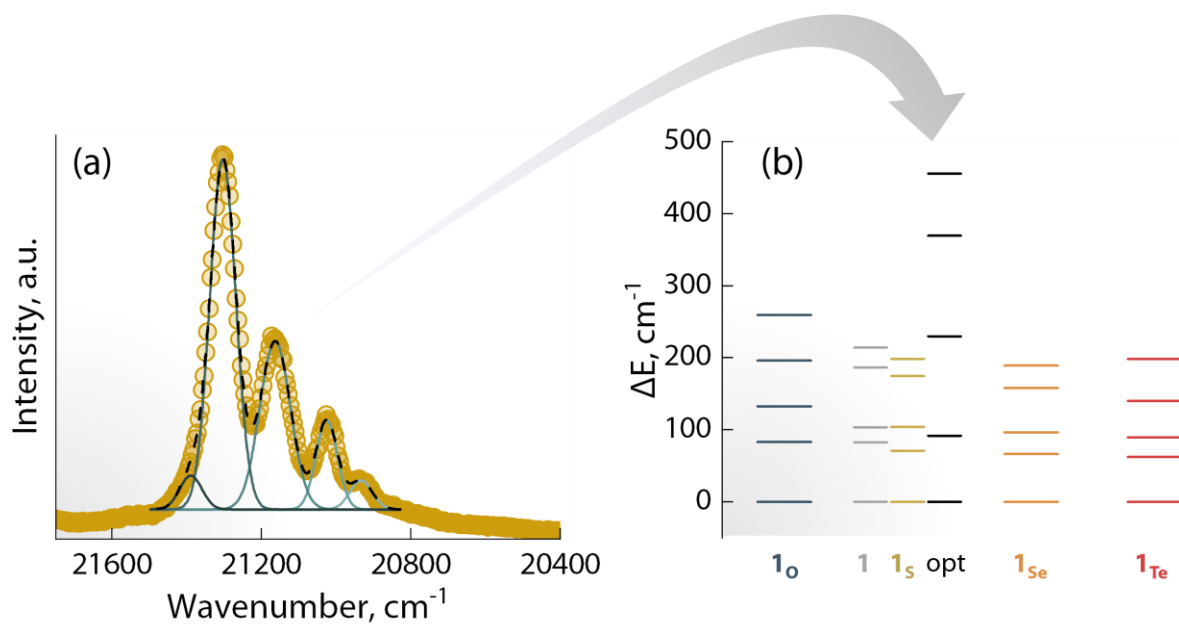

**Figure S11. a)** Deconvolution of the  ${}^6\text{H}_{15/2} \rightarrow {}^4\text{F}_{5/2}$  transition observed in the excitation spectrum in **Figure 4a** of the main manuscript. Therein, the yellow points are the recorded spectrum, the blue solid lines are the main components of the deconvolution, and the dashed black line is the resulting simulated spectrum. **b)** Comparison of the relative position of the  ${}^4\text{F}_{5/2}$  *m<sub>j</sub>* states for the different complexes explored. The values for **1<sub>o</sub>**, **1**, **1<sub>s</sub>**, **1<sub>se</sub>**, and **1<sub>Te</sub>** were obtained from Tables S9-S13. opt = optical.

**Table S25.** Optimized geometry for **1<sub>o</sub>** obtained from the DFT calculations.

|   |          |          |          |
|---|----------|----------|----------|
| C | 0.62119  | -2.44896 | -1.00470 |
| C | 0.71157  | -3.86621 | -1.44158 |
| C | 1.00359  | -4.86206 | -0.51470 |
| H | 1.17094  | -4.57567 | 0.51666  |
| C | 1.07734  | -6.18481 | -0.92113 |
| H | 1.30631  | -6.96194 | -0.20047 |
| C | 0.86051  | -6.51461 | -2.25341 |
| H | 0.92002  | -7.54996 | -2.57109 |
| C | 0.57075  | -5.52085 | -3.18031 |
| H | 0.40649  | -5.78031 | -4.22021 |
| C | 0.49606  | -4.19751 | -2.77578 |
| H | 0.27688  | -3.40195 | -3.47785 |
| C | 2.97846  | 0.98294  | 0.19687  |
| C | 4.38407  | 1.41165  | 0.39710  |
| C | 4.88656  | 1.59210  | 1.68191  |
| H | 4.23244  | 1.41471  | 2.52681  |
| C | 6.20123  | 1.99127  | 1.86045  |
| H | 6.59466  | 2.13242  | 2.86086  |
| C | 7.01540  | 2.21034  | 0.75605  |
| H | 8.04453  | 2.52257  | 0.89645  |
| C | 6.51488  | 2.03031  | -0.52747 |
| H | 7.15237  | 2.20163  | -1.38747 |
| C | 5.20051  | 1.63134  | -0.70835 |
| H | 4.78396  | 1.48281  | -1.69728 |
| C | -1.09113 | 2.32879  | -1.01576 |
| C | -1.91086 | 3.48567  | -1.45822 |
| C | -2.31187 | 4.44704  | -0.53568 |
| H | -2.00496 | 4.33310  | 0.49707  |
| C | -3.08383 | 5.52131  | -0.94824 |
| H | -3.39589 | 6.27236  | -0.23116 |
| C | -3.45548 | 5.63714  | -2.28212 |
| H | -4.05816 | 6.47928  | -2.60458 |
| C | -3.05422 | 4.67862  | -3.20457 |
| H | -3.34180 | 4.77380  | -4.24565 |
| C | -2.28260 | 3.60328  | -2.79402 |
| H | -1.95163 | 2.84408  | -3.49254 |
| C | -2.68348 | -0.93023 | -1.19027 |
| H | -2.15706 | -0.75682 | -2.12190 |
| C | -4.00365 | -1.39411 | -1.16822 |
| H | -4.51837 | -1.58705 | -2.10072 |
| C | -4.61663 | -1.59339 | 0.04223  |
| H | -5.63932 | -1.95137 | 0.09765  |
| C | -3.91259 | -1.33142 | 1.22943  |
| C | -2.58807 | -0.86809 | 1.10727  |
| C | -4.48093 | -1.51463 | 2.52566  |
| H | -5.50254 | -1.87137 | 2.59710  |
| C | -3.76215 | -1.25016 | 3.64160  |
| H | -4.19671 | -1.39062 | 4.62525  |
| C | -2.41671 | -0.78106 | 3.55435  |

## Electronic Supporting Information

|    |          |          |          |
|----|----------|----------|----------|
| C  | -1.82306 | -0.58773 | 2.29171  |
| C  | -1.63544 | -0.49645 | 4.68667  |
| H  | -2.05995 | -0.63365 | 5.67567  |
| C  | -0.34973 | -0.05071 | 4.52442  |
| H  | 0.28039  | 0.17749  | 5.37465  |
| C  | 0.15554  | 0.11125  | 3.22844  |
| H  | 1.16742  | 0.45966  | 3.05211  |
| N  | -2.00218 | -0.67641 | -0.08958 |
| N  | -0.55689 | -0.14788 | 2.14886  |
| O  | 0.32477  | -1.55370 | -1.84751 |
| O  | 2.22972  | 0.77657  | 1.20050  |
| O  | -0.75598 | 1.44296  | -1.85377 |
| O  | 0.82775  | -2.15344 | 0.20754  |
| O  | 2.53223  | 0.82321  | -0.97306 |
| O  | -0.74702 | 2.23263  | 0.19807  |
| Dy | 0.39122  | 0.16622  | -0.19752 |

---

**Table S26.** Optimized geometry for **1<sub>s</sub>** obtained from the DFT calculations.

|   |          |          |          |
|---|----------|----------|----------|
| C | 0.57034  | -2.60965 | 1.07977  |
| C | 1.13162  | -3.78956 | 1.77925  |
| C | 1.09435  | -5.06402 | 1.21809  |
| H | 0.63103  | -5.19367 | 0.24693  |
| C | 1.64086  | -6.13940 | 1.89820  |
| H | 1.60894  | -7.12931 | 1.45737  |
| C | 2.22617  | -5.95080 | 3.14405  |
| H | 2.65140  | -6.79468 | 3.67630  |
| C | 2.26357  | -4.68243 | 3.70985  |
| H | 2.71462  | -4.53589 | 4.68489  |
| C | 1.71960  | -3.60516 | 3.03096  |
| H | 1.73153  | -2.60845 | 3.45482  |
| C | -3.26291 | 0.09082  | 0.33373  |
| C | -4.73554 | 0.10691  | 0.18543  |
| C | -5.28714 | 0.04315  | -1.09416 |
| H | -4.62092 | -0.01903 | -1.94514 |
| C | -6.66093 | 0.05576  | -1.26415 |
| H | -7.08398 | 0.00425  | -2.26109 |
| C | -7.49642 | 0.13371  | -0.15707 |
| H | -8.57272 | 0.14401  | -0.28958 |
| C | -6.95314 | 0.19776  | 1.11988  |
| H | -7.60380 | 0.25856  | 1.98474  |
| C | -5.57950 | 0.18362  | 1.29161  |
| H | -5.14066 | 0.23208  | 2.28122  |
| C | 0.75690  | 2.60847  | 1.03146  |
| C | 1.37935  | 3.75782  | 1.72876  |
| C | 1.40993  | 5.03149  | 1.16546  |
| H | 0.95706  | 5.18355  | 0.19262  |
| C | 2.00864  | 6.07822  | 1.84629  |
| H | 2.02946  | 7.06786  | 1.40423  |
| C | 2.57852  | 5.86156  | 3.09476  |
| H | 3.04438  | 6.68327  | 3.62766  |
| C | 2.54846  | 4.59387  | 3.66251  |
| H | 2.98755  | 4.42579  | 4.63952  |
| C | 1.95235  | 3.54508  | 2.98299  |
| H | 1.91096  | 2.54986  | 3.40845  |
| C | 3.05734  | -0.12557 | 0.16167  |
| H | 2.78038  | -0.11029 | 1.20938  |
| C | 4.39563  | -0.18892 | -0.23964 |
| H | 5.17676  | -0.22374 | 0.50890  |
| C | 4.68651  | -0.20511 | -1.57962 |
| H | 5.71284  | -0.25321 | -1.92790 |
| C | 3.64153  | -0.15820 | -2.51691 |
| C | 2.32540  | -0.09682 | -2.01893 |
| C | 3.86525  | -0.16927 | -3.92632 |
| H | 4.88671  | -0.21679 | -4.28734 |
| C | 2.82773  | -0.12111 | -4.79367 |
| H | 3.00070  | -0.12887 | -5.86420 |
| C | 1.48149  | -0.05824 | -4.32356 |
| C | 1.22332  | -0.04736 | -2.93869 |
| C | 0.37711  | -0.00577 | -5.18942 |
| H | 0.53923  | -0.01218 | -6.26207 |

## Electronic Supporting Information

|    |          |          |          |
|----|----------|----------|----------|
| C  | -0.88826 | 0.05323  | -4.66543 |
| H  | -1.76226 | 0.09534  | -5.30287 |
| C  | -1.04777 | 0.05904  | -3.27559 |
| H  | -2.02953 | 0.10336  | -2.81738 |
| N  | 2.05731  | -0.08150 | -0.69867 |
| N  | -0.02807 | 0.01031  | -2.43862 |
| O  | 0.70572  | -1.48305 | 1.61428  |
| O  | -2.55795 | 0.05443  | -0.71244 |
| O  | 0.82906  | 1.47783  | 1.57044  |
| S  | -0.23899 | -2.76526 | -0.43465 |
| S  | -2.51508 | 0.11647  | 1.87863  |
| S  | -0.04150 | 2.79964  | -0.48451 |
| Dy | -0.33852 | 0.02834  | 0.09276  |

---



**Table S27.** Optimized geometry for **1<sub>se</sub>** obtained from the DFT calculations.

|   |          |          |          |
|---|----------|----------|----------|
| C | 0.85937  | 2.61268  | -1.10128 |
| C | 1.42560  | 3.72720  | -1.89146 |
| C | 1.44416  | 5.03658  | -1.41596 |
| H | 1.02288  | 5.24541  | -0.43910 |
| C | 1.99115  | 6.04853  | -2.18645 |
| H | 2.00293  | 7.06564  | -1.81166 |
| C | 2.52005  | 5.76183  | -3.43886 |
| H | 2.94446  | 6.55659  | -4.04253 |
| C | 2.50162  | 4.45850  | -3.92009 |
| H | 2.90812  | 4.23569  | -4.90024 |
| C | 1.95870  | 3.44413  | -3.15039 |
| H | 1.92752  | 2.42204  | -3.50765 |
| C | -3.17332 | 0.04702  | -0.17685 |
| C | -4.63259 | 0.07426  | 0.05721  |
| C | -5.10365 | 0.11349  | 1.37062  |
| H | -4.38572 | 0.12380  | 2.18074  |
| C | -6.46369 | 0.13994  | 1.62555  |
| H | -6.82266 | 0.17098  | 2.64818  |
| C | -7.36776 | 0.12690  | 0.57085  |
| H | -8.43361 | 0.14742  | 0.76985  |
| C | -6.90599 | 0.08773  | -0.73881 |
| H | -7.60996 | 0.07748  | -1.56299 |
| C | -5.54596 | 0.06187  | -0.99531 |
| H | -5.17188 | 0.03151  | -2.01223 |
| C | 0.78068  | -2.64992 | -1.07157 |
| C | 1.30217  | -3.79216 | -1.85307 |
| C | 1.26432  | -5.09834 | -1.37010 |
| H | 0.83204  | -5.28368 | -0.39331 |
| C | 1.76994  | -6.13690 | -2.13346 |
| H | 1.73772  | -7.15146 | -1.75301 |
| C | 2.31357  | -5.87999 | -3.38602 |
| H | 2.70548  | -6.69540 | -3.98409 |
| C | 2.35137  | -4.57983 | -3.87465 |
| H | 2.76936  | -4.37999 | -4.85493 |
| C | 1.84974  | -3.53911 | -3.11219 |
| H | 1.86238  | -2.51872 | -3.47535 |
| C | 3.20090  | -0.04151 | -0.09403 |
| H | 2.91881  | -0.04278 | -1.14023 |
| C | 4.54242  | -0.05717 | 0.29913  |
| H | 5.31956  | -0.07057 | -0.45423 |
| C | 4.84136  | -0.05536 | 1.63735  |
| H | 5.87062  | -0.06746 | 1.98000  |
| C | 3.80087  | -0.03770 | 2.58038  |
| C | 2.47975  | -0.02239 | 2.09157  |
| C | 4.03560  | -0.03548 | 3.98794  |
| H | 5.06092  | -0.04776 | 4.34086  |
| C | 3.00373  | -0.01844 | 4.86286  |
| H | 3.18469  | -0.01706 | 5.93209  |
| C | 1.65292  | -0.00227 | 4.40239  |
| C | 1.38348  | -0.00334 | 3.01929  |
| C | 0.55472  | 0.01521  | 5.27728  |
| H | 0.72586  | 0.01654  | 6.34853  |

### Electronic Supporting Information

|    |          |          |           |
|----|----------|----------|-----------|
| C  | -0.71605 | 0.02997  | 4.76314   |
| H  | -1.58593 | 0.04327  | 5.40752   |
| C  | -0.88625 | 0.02747  | 3.37476   |
| H  | -1.87219 | 0.03849  | 2.92383   |
| N  | 2.20408  | -0.02454 | 0.77193   |
| N  | 0.12699  | 0.01153  | 2.52881   |
| O  | 0.95608  | 1.45087  | -1.54883  |
| O  | -2.40659 | 0.04727  | 0.81858   |
| O  | 0.92308  | -1.49660 | -1.52798  |
| Se | 0.00176  | 2.89802  | 0.54266   |
| Se | -2.44437 | 0.01425  | -1.89512  |
| Se | -0.08830 | -2.88848 | 0.57444   |
| Dy | -0.18418 | 0.00287  | -0.012817 |

---

**Table S28.** Optimized geometry for **1<sub>Te</sub>** obtained from the DFT calculations.

|   |          |          |          |
|---|----------|----------|----------|
| C | 0.26270  | 2.77462  | -1.14318 |
| C | 0.60153  | 3.90704  | -2.02723 |
| C | 0.29689  | 5.22471  | -1.69335 |
| H | -0.21259 | 5.42520  | -0.75681 |
| C | 0.63992  | 6.25725  | -2.54900 |
| H | 0.40030  | 7.28041  | -2.28326 |
| C | 1.28611  | 5.98173  | -3.74783 |
| H | 1.55000  | 6.79136  | -4.41937 |
| C | 1.59000  | 4.66936  | -4.08935 |
| H | 2.08724  | 4.45399  | -5.02846 |
| C | 1.25231  | 3.63562  | -3.23370 |
| H | 1.47272  | 2.60469  | -3.48250 |
| C | -3.03103 | -0.82930 | -0.23515 |
| C | -4.45369 | -1.11587 | 0.02985  |
| C | -4.96867 | -0.84900 | 1.30078  |
| H | -4.31201 | -0.42477 | 2.04998  |
| C | -6.29903 | -1.10372 | 1.58344  |
| H | -6.69529 | -0.88362 | 2.56842  |
| C | -7.12685 | -1.63873 | 0.60418  |
| H | -8.16872 | -1.84155 | 0.82628  |
| C | -6.62053 | -1.90994 | -0.66088 |
| H | -7.26455 | -2.32794 | -1.42596 |
| C | -5.29304 | -1.64474 | -0.94871 |
| H | -4.88717 | -1.84805 | -1.93377 |
| C | 1.76158  | -2.28260 | -1.00614 |
| C | 2.68654  | -3.08990 | -1.82571 |
| C | 3.10146  | -4.36209 | -1.43849 |
| H | 2.72783  | -4.77660 | -0.50821 |
| C | 3.97586  | -5.08200 | -2.23411 |
| H | 4.29524  | -6.07113 | -1.92667 |
| C | 4.43954  | -4.53905 | -3.42606 |
| H | 5.12105  | -5.10613 | -4.05060 |
| C | 4.02698  | -3.27206 | -3.82085 |
| H | 4.38294  | -2.85173 | -4.75475 |
| C | 3.15658  | -2.54826 | -3.02501 |
| H | 2.81637  | -1.56198 | -3.31627 |
| C | 3.15548  | 0.95349  | 0.20914  |
| H | 2.96810  | 0.86551  | -0.85459 |
| C | 4.39710  | 1.36990  | 0.69698  |
| H | 5.19070  | 1.61145  | 0.00164  |
| C | 4.57932  | 1.46219  | 2.05314  |
| H | 5.52920  | 1.78133  | 2.46878  |
| C | 3.52230  | 1.13777  | 2.91864  |
| C | 2.30616  | 0.72951  | 2.33655  |
| C | 3.64083  | 1.20375  | 4.33906  |
| H | 4.58627  | 1.52130  | 4.76475  |
| C | 2.59852  | 0.87657  | 5.13694  |
| H | 2.69121  | 0.92491  | 6.21631  |
| C | 1.35267  | 0.45774  | 4.58065  |
| C | 1.19710  | 0.38848  | 3.18182  |
| C | 0.25058  | 0.10540  | 5.37559  |
| H | 0.33616  | 0.14790  | 6.45615  |

## Electronic Supporting Information

|    |          |          |          |
|----|----------|----------|----------|
| C  | -0.91559 | -0.28927 | 4.77184  |
| H  | -1.78490 | -0.57166 | 5.35202  |
| C  | -0.97845 | -0.32592 | 3.37597  |
| H  | -1.88048 | -0.62979 | 2.85713  |
| N  | 2.14396  | 0.64554  | 1.00076  |
| N  | 0.04055  | 0.00317  | 2.60223  |
| O  | 0.66663  | 1.63689  | -1.45385 |
| O  | -2.28574 | -0.57188 | 0.73958  |
| O  | 1.52154  | -1.11152 | -1.35786 |
| Te | -0.87872 | 2.98590  | 0.60764  |
| Te | -2.21696 | -0.78925 | -2.16214 |
| Te | 0.81900  | -3.02132 | 0.72108  |
| Dy | -0.08213 | -0.05024 | 0.05356  |

---

## 6. Simulation of the thermometric performance

As explained in the main text, the luminescence thermometry approach proposed in this study relies on the temperature-driven redistribution of the electron populations within the 5  $mj$  levels of the  $Dy^{3+}:^4F_{9/2}$  emitting state (see also **Figure 6c**). Electron population redistribution within two thermally coupled energy levels can be described by a Boltzmann function as follows:

$$\frac{N_2}{N_1} = \left(\frac{g_2}{g_1}\right) \exp\left(\frac{-\Delta E_{12}}{k_B T}\right) \quad (S6)$$

Where  $\Delta E_{12}$  is the energy difference between the two levels,  $k_B$  is the Boltzmann constant,  $T$  is the temperature,  $g_i$  and  $N_i$  are, respectively, the degeneracy and the electron population of the  $i$ -th level. Since all the  $mj$  levels are doubly degenerate (Kramers doublets) in  $Dy^{3+}$  under no applied magnetic field, the ratio between the degeneracies is equal to unity. It is therefore possible to build a system of equations like the one below to describe the electron population distribution at a given temperature:

$$\left\{ \begin{array}{l} N_1 + N_2 + N_3 + N_4 + N_5 = 1 \\ N_2 = N_1 \exp\left(\frac{-\Delta E_{12}}{k_B T}\right) \\ N_3 = N_2 \exp\left(\frac{-\Delta E_{23}}{k_B T}\right) \\ N_4 = N_3 \exp\left(\frac{-\Delta E_{34}}{k_B T}\right) \\ N_5 = N_4 \exp\left(\frac{-\Delta E_{45}}{k_B T}\right) \end{array} \right. \quad (S7)$$

Solving the system of equations, leads to:

$$\left\{ \begin{array}{l} N_1 = \frac{1}{1 + \exp\left(\frac{-\Delta E_{12}}{k_B T}\right) + \exp\left(\frac{-\Delta E_{13}}{k_B T}\right) + \exp\left(\frac{-\Delta E_{14}}{k_B T}\right) + \exp\left(\frac{-\Delta E_{15}}{k_B T}\right)} \\ N_i = \frac{\exp\left(\frac{-\Delta E_{1i}}{k_B T}\right)}{1 + \exp\left(\frac{-\Delta E_{12}}{k_B T}\right) + \exp\left(\frac{-\Delta E_{13}}{k_B T}\right) + \exp\left(\frac{-\Delta E_{14}}{k_B T}\right) + \exp\left(\frac{-\Delta E_{15}}{k_B T}\right)} \end{array} \right. \quad (S8)$$

Considering the low temperatures at which the study is conducted, in a first approximation the thermometric performance will be determined by the electron population redistribution within the first two  $mj$  states. Hence, in Figure 6d of the main text the trend of  $N_2/N_1$  vs temperature has been reported.

## References

1. V. V. Savant, J. Gopalakrishnan, C. C. Patel *Inorg. Chem.*, 1970, **9**, 748-751.
2. D. Reta, N. F. Chilton, *Phys. Chem. Chem. Phys.*, **2019**, *21*, 23567-23575.
3. C. D. S. Brites, A. Millán and L. D. Carlos, in *Handbook on the Physics and Chemistry of Rare Earths*, Vol. 49 (Eds: J.-C. G. Bünzli, V. K. Pecharsky), Elsevier Science, B. V., Amsterdam 2016, p. 339.
4. Gaussian 16, Revision C.01, M. J. Frisch, G. W. Trucks, H. B. Schlegel, G. E. Scuseria, M. A. Robb, J. R. Cheeseman, G. Scalmani, V. Barone, G. A. Petersson, H. Nakatsuji, X. Li, M. Caricato, A. V. Marenich, J. Bloino, B. G. Janesko, R. Gomperts, B. Mennucci, H. P. Hratchian, J. V. Ortiz, A. F. Izmaylov, J. L. Sonnenberg, D. Williams-Young, F. Ding, F. Lipparini, F. Egidi, J. Goings, B. Peng, A. Petrone, T. Henderson, D. Ranasinghe, V. G. Zakrzewski, J. Gao, N. Rega, G. Zheng, W. Liang, M. Hada, M. Ehara, K. Toyota, R. Fukuda, J. Hasegawa, M. Ishida, T. Nakajima, Y. Honda, O. Kitao, H. Nakai, T. Vreven, K. Throssell, J. A. Montgomery, Jr., J. E. Peralta, F. Ogliaro, M. J. Bearpark, J. J. Heyd, E. N. Brothers, K. N. Kudin, V. N. Staroverov, T. A. Keith, R. Kobayashi, J. Normand, K. Raghavachari, A. P. Rendell, J. C. Burant, S. S. Iyengar, J. Tomasi, M. Cossi, J. M. Millam, M. Klene, C. Adamo, R. Cammi, J. W. Ochterski, R. L. Martin, K. Morokuma, O. Farkas, J. B. Foresman, and D. J. Fox, Gaussian, Inc., Wallingford CT, 2016.
5. M. Ernzerhof and G. E. Scuseria, *J. Chem. Phys.*, 1999, **110**, 5029-5036.
6. C. Adamo and V. Barone, *J. Chem. Phys.*, 1999, **110**, 6158-6170.
7. S. Grimme, J. Antony, S. Ehrlich and H. Krieg, *J. Chem. Phys.*, 2010, **132**, 154104.
8. S. Grimme, S. Ehrlich and L. Goerigk, *J. Comput. Chem.*, 2011, **32**, 1456-1465
9. A. Schäfer, C. Huber and R. Ahlrichs, *J. Chem. Phys.*, 1994, **100**, 5829-5835.
10. K. Eichkorn, F. Weigend, O. Treutler and R. Ahlrichs, *Theor. Chem. Acc.*, 1997, **97**, 119-124.
11. T. R. Cundari and W. J. Stevens, *J. Chem. Phys.*, 1993, **98**, 5555-5565.
12. P. Pollak, F. Weigend, *J. Chem. Theory Comput.* 2017, **13**, 3696-3705.
13. R.F.W. Bader, *Atoms in Molecules: A Quantum Theory*, Oxford University Press, Oxford (1990)
14. AIMAll (Version 19.10.12), Todd A. Keith, TK Gristmill Software, Overland Park KS, USA, 2019.
15. A. Kerridge, *Chem. Commun.*, 2017, **53**, 6685.
16. T. Yanai, D. P. Tew and N. C. Handy, *Chem. Phys. Lett.*, 2004, **393**, 51-57.
17. O. A. Vydrov, J. Heyd, A. V. Krukau and G. E. Scuseria, *J. Chem. Phys.*, 2006, **125**, 074106.
18. O. A. Vydrov and G. E. Scuseria, *J. Chem. Phys.*, 2006, **125**, 234109.
19. O. A. Vydrov, G. E. Scuseria and J. P. Perdew, *J. Chem. Phys.*, 2007, **126**, 154109.
20. F. Weigend and R. Ahlrichs, *Phys. Chem. Chem. Phys.*, 2005, **7**, 3297-3305.
21. B. O. Roos, P. R. Taylor and P. E. M. Sigbahn, *Chem. Phys.*, 1980, **48**, 157-173
22. P. Siegbahn, A. Heiberg, B. Roos and B. Levy, *Phys. Scr.*, 1980, **21**, 323-327.
23. B. O. Roos, R. Lindh, P. Å. Malmqvist, V. Veryazov, P.-O. Widmark, *Multiconfigurational Quantum Chemistry*, John Wiley & Sons, Ltd, 1st edn., 2016.
24. B. A. Hess, *Phys. Rev. A*, 1986, **33**, 3742-3748.
25. M. Douglas and N. M. Kroll, *Ann. Phys.*, 1974, **82**, 89-155.
26. B. A. Heß, C. M. Marian, U. Wahlgren and O. Gropen, *Chem. Phys. Lett.*, 1996, **251**, 365-371.
27. I. Fdez. Galván, M. Vacher, A. Alavi, C. Angeli, F. Aquilante, J. Autschbach, J. J. Bao, S. I. Bokarev, N. A. Bogdanov, R. K. Carlson, L. F. Chibotaru, J. Creutzberg, N. Dattani, M. G. Delcey, S. S. Dong, A. Dreuw, L. Freitag, L. M. Frutos, L. Gagliardi, F. Gendron, A. Giussani, L. González, G. Grell, M. Guo, C. E. Hoyer, M. Johansson, S. Keller, S. Knecht, G. Kovačević, E. Källman, G. Li Manni, M. Lundberg, Y. Ma, S. Mai, J. P. Malhado, P. Å. Malmqvist, P. Marquetand, S. A. Mewes, J. Norell, M. Olivucci, M. Oppel, Q. M. Phung, K. Pierloot, F. Plasser, M. Reiher, A. M. Sand, I. Schapiro, P. Sharma, C. J. Stein, L. K. Sørensen, D. G. Truhlar, M. Ugandi, L. Ungur, A. Valentini, S. Vancoillie, V. Veryazov, O. Weser, T. A. Wesolowski, P.-O. Widmark, S. Wouters, A. Zech, J. P. Zobel and R. Lindh, *J. Chem. Theory Comput.*, 2019, **15**, 5925-5964.
28. B. O. Roos, R. Lindh, P.-Å. Malmqvist, V. Veryazov, P.-O. Widmark and A. C. Borin, *J. Phys. Chem. A*, 2008, **112**, 11431-11435.

## Electronic Supporting Information

29. B. O. Roos, R. Lindh, P.-Å. Malmqvist, V. Veryazov and P.-O. Widmark, *J. Phys. Chem. A*, 2004, **108**, 2851–2858
30. D. Peng, M. Reiher, *Theor. Chem. Acc.* 2012, **131**, 1081.
31. Filatov, *J. Chem. Phys.* 2006, **125**, 107101
32. W. Kutzelnigg, W. Liu, *J. Chem. Phys.* 2005, **123**, 241102.
33. L. F. Chibotaru and L. Ungur, *J. Chem. Phys.*, 2012, **137**, 064112.
34. L. Ungur and L. F. Chibotaru, *Chem. - A Eur. J.*, 2017, **23**, 3708–3718.
35. L. Ungur, M. Thewissen, J.-P. Costes, W. Wernsdorfer and L. F. Chibotaru, *Inorg. Chem.*, 2013, **52**, 6328–6337.
